# Supplementary material
Source: ML conference proceedings conference paper supplement (https://openaccess.thecvf.com/content/WACV2023/html/Kurita_Simultaneous_Acquisition_of_WACV_2023_paper.html)
Supplement: Supplementary file 1 [file Kurita_Simultaneous_Acquisition_of_WACV_2023_supplemental.pdf]

# Supplemental Material: Simultaneous Acquisition of High Quality RGB image and Polarization Information using a Sparse Polarization Sensor

Teppei Kurita    Yuhi Kondo    Legong Sun    Yusuke Moriuchi  
Sony Group Corporation

{Teppei.Kurita, Yuhi.Kondo, Legong.Sun, Yusuke.Moriuchi}@sony.com

<https://github.com/sony/polar-densification>

This supplement is outlined as follows. References to the main study (Section, Equations, Figures and Tables) are [highlighted in blue](#). Section 1 describes the details of the network architecture in [Sec. 3](#) of the main study. Section 2 describes the details of our independently acquired real-world and generated synthetic datasets in [Sec 3.4](#) of the main study. Section 3 describes the details of the experiments discussed in [Sec. 4](#) of the main study. This includes simulation data generation and demosaicing methods as well as detailed quantitative and qualitative experimental results.

## 1. Network architecture details

### 1.1. RGB refinement network (RGRN)

Figure 1 shows the details of the RGRN discussed in [Sec. 3.3](#) of the main study. The RGB image, stokes vector, and polarization pixel masks are combined in the direction of the input channel. The network consists of four refinement blocks, which are primarily based on full convolution without resolution reduction to learn the difference from the input RGB image.

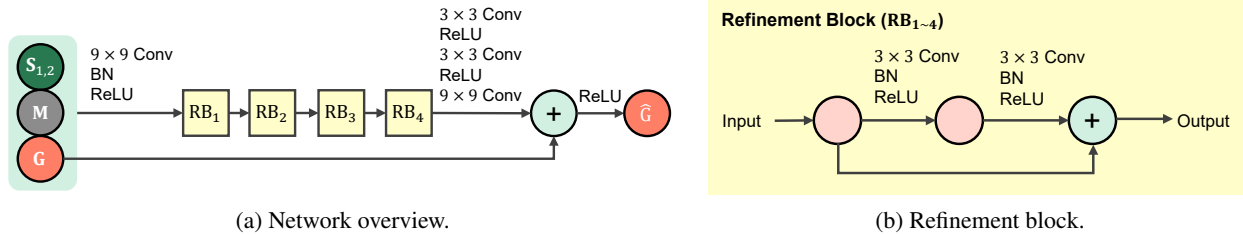

Figure 1. **Details of RGB refinement network (RGRN).** (a) Network overview, and (b) refinement block.

### 1.2. Polarization compensation network (PCN)

In this section, the details of the PCN discussed in [Sec. 3.3](#) and [Fig. 6](#) of the main study are described in detail. Each encoder and decoder block in the network is organized as shown in [Fig. 2](#). The encoder block first performs convolution to generate the features to be connected to the decoder and then performs convolution with a stride set to 2 to generate low-resolution features. The decoder block generates high-resolution features via transposed convolution with a stride set to 2. Moreover, although omitted in the main study, the polarization information  $\hat{S}_{1,2}$  is obtained as the final output by blending the first and second outputs,  $\hat{S}_{1,2}^{1st}$  and  $\hat{S}_{1,2}^{2nd}$ , with their respective confidence levels,  $\hat{C}^{1st}$  and  $\hat{C}^{2nd}$ , using [Eqn. 1](#), as follows.

$$\hat{S}_{1,2} = \frac{e^{\hat{C}^{1st}} \cdot \hat{S}_{1,2}^{1st} + e^{\hat{C}^{2nd}} \cdot \hat{S}_{1,2}^{2nd}}{e^{\hat{C}^{1st}} + e^{\hat{C}^{2nd}}}. \quad (1)$$

## 2. Dataset details

This section discusses the datasets in [Sec. 3.4](#) of the main study in detail. A comparison with other published datasets that are more detailed than [Tab. 2](#) in the main study is presented in [Tab. 1](#). Herein, the vertical and horizontal resolution

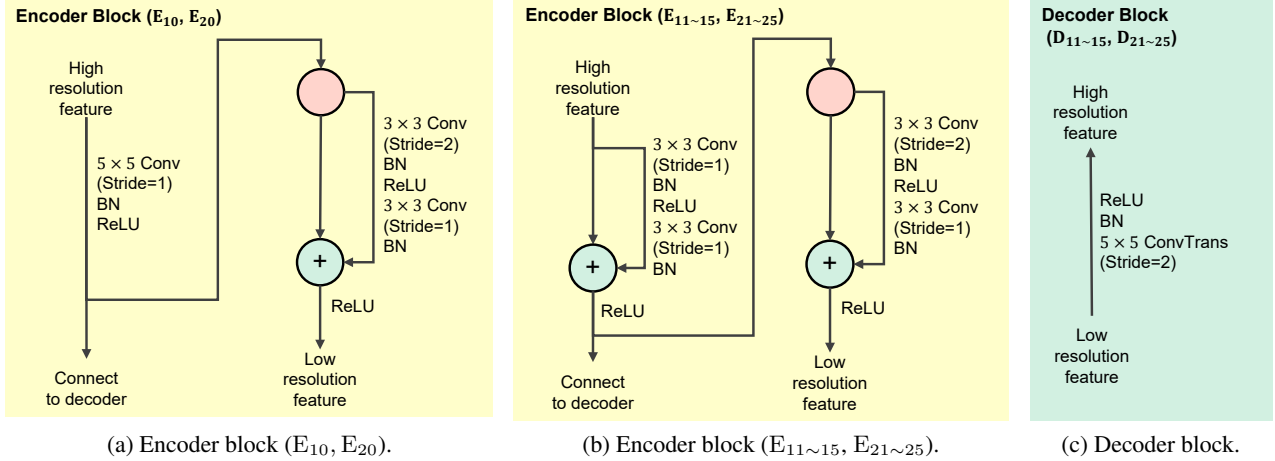

Figure 2. **Details of the polarization compensation network (PCN).** (a) Encoder block ( $E_{10}, E_{20}$ ). (b) Encoder block ( $E_{11\sim 15}, E_{21\sim 25}$ ). (c) Decoder block ( $D_{11\sim 15}, D_{21\sim 25}$ ).

(Resolution), type of scene (Level), and type of accompanying ground truth data (Ground truth) have been compared. All of our datasets consist of scenes, and the depth, surface normals, reflectance and segmentation masks of the synthetic datasets were simultaneously generated, as shown in Fig 3.

Further, we have described the details of the synthetic dataset. Herein, a polarization-reflective ray-tracing renderer was implemented and used. As mentioned in the main study, the floorplans, camera positions, and objects were procedurally generated. Furthermore, 110 floorplans and 100 data for each floorplan were generated. The camera field of view (FOV) was randomly selected from  $30^\circ$  to  $120^\circ$ , the F value was randomly selected from 0.8 to 8, and the camera roll was randomly selected from  $-15^\circ$  to  $15^\circ$ . Half of the scenes were set up as day and the other half as night. Additionally, an outdoor environment map was set up as the light source for the day scenes. The number of SPP (sample per pixel) was set to 100, and the maximum number of ray bounces was set to 7. The NVIDIA OptiX Denoiser [2] was used to remove the noise and improve the quality of RGB images. It takes approximately 8 s to render 1.3 M ( $1216 \times 1024$ ) data on an NVIDIA RTX3090 GPU, and 11000 data can be generated in approximately 1 d.

We acquired real-world datasets by two methods: using a polarization camera and turning a polarizer. Figure 4 shows examples of each dataset. Using a polarization camera to acquire images is easy; however, the resolution of the polarization camera is limited and the data quality is not high because of the demosaicing artifacts, as shown in Fig. 4(a). If a polarizer is rotated in front of the RGB camera, high-quality data equivalent to that of a normal high-resolution camera can be acquired, as shown in Fig. 4 (b); however, large amounts of data cannot be acquired rapidly because obtaining one image takes several minutes.

Table 1. Comparison between different polarization datasets

| Dataset | Level  | Collection          | Size  | Resolution                               | Ground truth                                                                           |
|---------|--------|---------------------|-------|------------------------------------------|----------------------------------------------------------------------------------------|
| Ba [1]  | Object | Polarization Camera | 263   | $1224 \times 1024$                       | RGB, Polarization, Surface Normal                                                      |
| Lei [4] | Scene  | Polarization Camera | 522   | $1224 \times 1024$                       | RGB, Polarization, Surface Normal, Depth                                               |
| Ono [5] | Scene  | Polarization Camera | 69    | $2448 \times 2048$                       | RGB, Polarization                                                                      |
|         | Scene  | Polarizer Rotation  | 13    | $2080 \times 2080$                       | RGB, Polarization                                                                      |
| Ours    | Scene  | Synthetic           | 11000 | $1216 \times 1024$ &<br>$768 \times 576$ | RGB, Polarization ( $S_{1,2}$ ), Surface Normal, Depth, Reflectance, Segmentation Mask |
|         | Scene  | Polarization Camera | 811   | $2448 \times 2048$                       | RGB, Polarization                                                                      |
|         | Scene  | Polarizer Rotation  | 238   | $5472 \times 3648$                       | RGB, Polarization                                                                      |

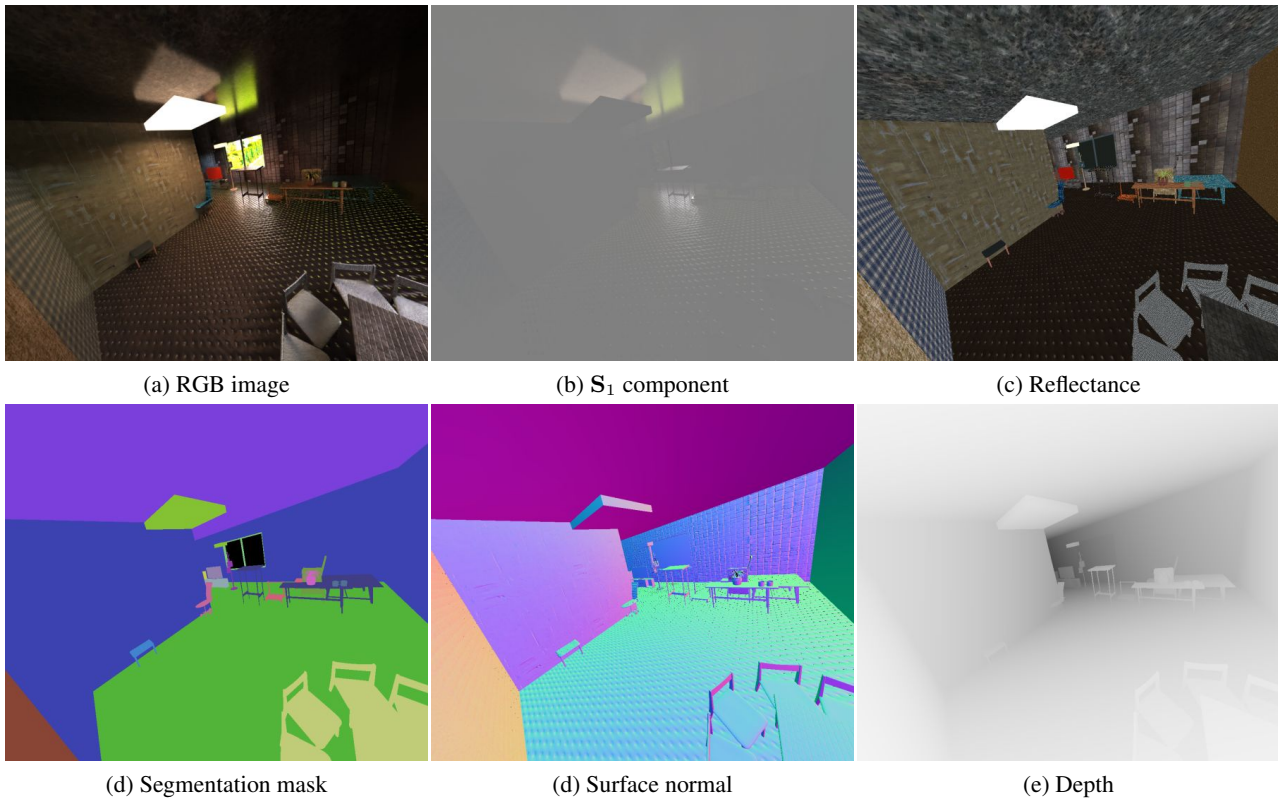

Figure 3. **Details of the synthetic dataset.** (a) RGB image ( $S_0$  component), (b)  $S_1$  component, (c) reflectance, (d) segmentation mask, (d) surface normal, and (e) depth.

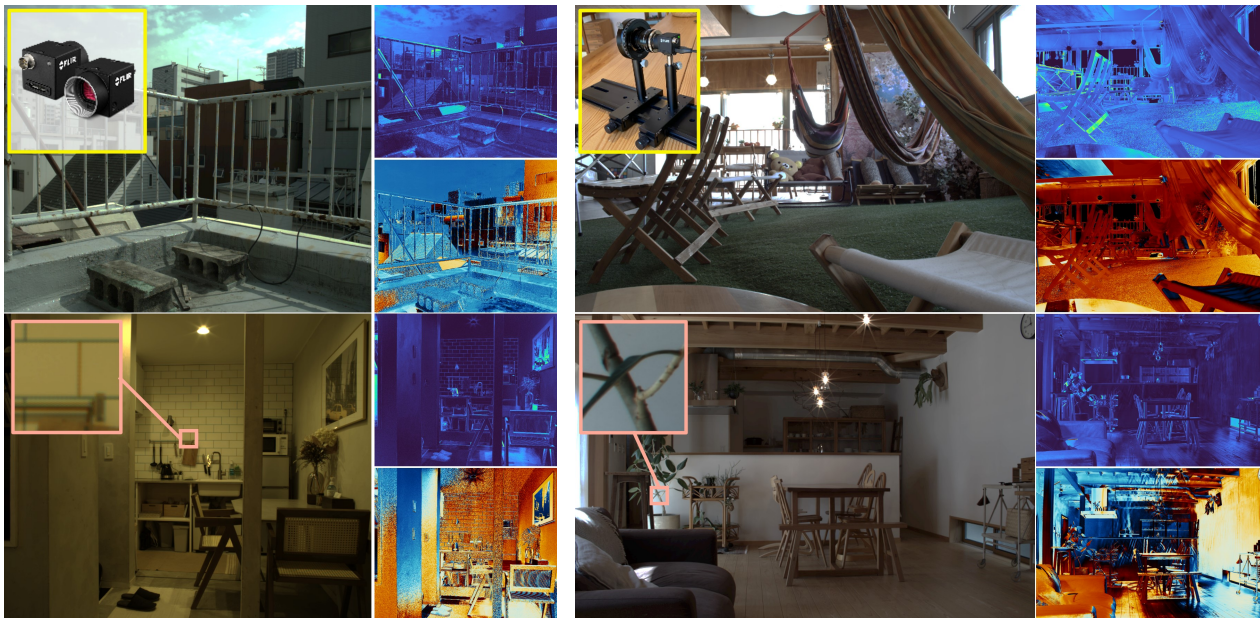

(a) Polarization camera

(b) Polarizer rotation

Figure 4. **Details of real-world datasets.** (a) Polarization camera, and (b) polarizer rotation.

### 3. Experiment details

#### 3.1. Dataset and implementation details

This section discusses the simulation method used to generate the raw data for the sparse polarization sensor in each dataset that was used in [Sec. 4.1](#) of the main study.

**Raw image generation from synthetic dataset:** The synthetic dataset consists of RGB data and the  $S_{1,2}$  ground truth, as shown in [Fig. 5](#) (a). The RGB image and  $S_{1,2}$  are grayed and the four-polarization angle image is calculated to reflect the sensitivity difference. Each pixel from the RGB image and the generated four-polarization angle image are selected to generate raw data.

**Raw image generation from polarization camera dataset:** A conventional polarization camera produces a raw image, as shown in [Fig. 5](#) (b). Demosaicing is performed to generate an RGB image and a four-polarization angle image. Subsequently, the four-polarization angle image is multiplied by the sensitivity difference gain. Finally, each pixel from the RGB image and the generated four-polarization angle image is selected to generate the raw data.

**Raw image generation from polarizer rotation dataset:** A polarizer is placed on the entire surface of a regular RGB camera and rotated to obtain an RGB image with four-polarization angles, as shown in [Fig. 5](#) (c). A non-polarized RGB image is generated by averaging the RGB values of the four-polarization angles. The RGB images of each of the four-polarization angles are grayed to produce a one-channel four-polarization angle image. Next, the four-polarization angle image is multiplied by the sensitivity difference gain. Raw data is generated by selecting each pixel from the RGB image and the generated four-polarization angle image. Finally, as the raw image generated here is used for evaluation purposes, it is noised according to the noise model of the sensor.

#### 3.2. Demosaicing

This section details the demosaicing process implemented to obtain RGB and four-polarization angle images in [Sec. 3.3](#) of the main study. Demosaicing is a method that considers the pixels near the target pixel and their spatial frequency [[3](#), [5](#)]. For sparse polarization sensors, the same process is used for unpolarized pixels to generate RGB values, and four-polarization angle pixels are interpolated in the range of  $2 \times 2$  to generate the sparse stokes vector, as shown in [Fig. 6](#).

#### 3.3. Additional assessment results

This section discusses the additional results of the evaluation in [Sec 4.2](#) of the main study.

**Ablation study:** [Table 2](#) presents a comparison of the ablation study in [Tab 4](#) of the main study for different percentages of polarization pixels. The results show that the higher the ratio of polarization pixels, the more effective FTB and AFA are. Conversely, when the percentage of polarized pixels is low ( $r = 1/64$ ), FTB and AFA are not as effective. This may be because the extremely low number of polarization pixels limits the generation of valid features for completion, thereby limiting the effectiveness of FTB and AFA. Therefore, we did not implement FTB and AFA when the percentage of polarized pixels was very low.

**Comparison with depth completion and upsampling networks:** [Table 3](#) presents a comparison of the proposed method with other networks discussed in [Tab. 5](#) of the main study for different percentages of polarization pixels. Furthermore, the computation time has been additionally described. The results show that the smaller the percentage of polarization pixels, the more effective our method is. When the percentage of polarization pixels is high, although NLSPN may perform slightly better than our method for some indices, it requires more computation time. [Figure 7](#) and [8](#) compare the results of our method with other methods (conventional polarization sensors, basic methods ([Eqn. 2](#) and [Eqn. 3](#) of the main study), and other networks). The effectiveness of our method can be qualitatively confirmed.

**Comparison between the synthetic and real-world datasets:** [Table 4](#) presents a comparison of the datasets discussed in [Tab. 6](#) of the main study with different percentages of polarized pixels. The trend of the parameters is the same for different percentages of polarized pixels.

**Additional qualitative evaluation results:** The qualitative evaluation results of our method in various scenes, which could not be described in the main study due to space limitations, are shown in [Fig. 9,10,11,12,13,14,15,16,17](#), and [18](#). The effectiveness of our method for conventional polarization sensors can be confirmed.

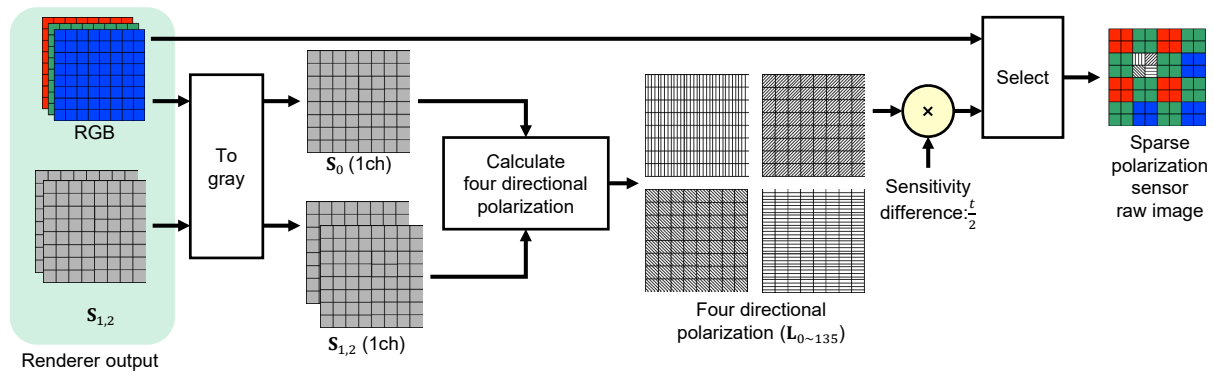

(a) Raw image generation for synthetic dataset

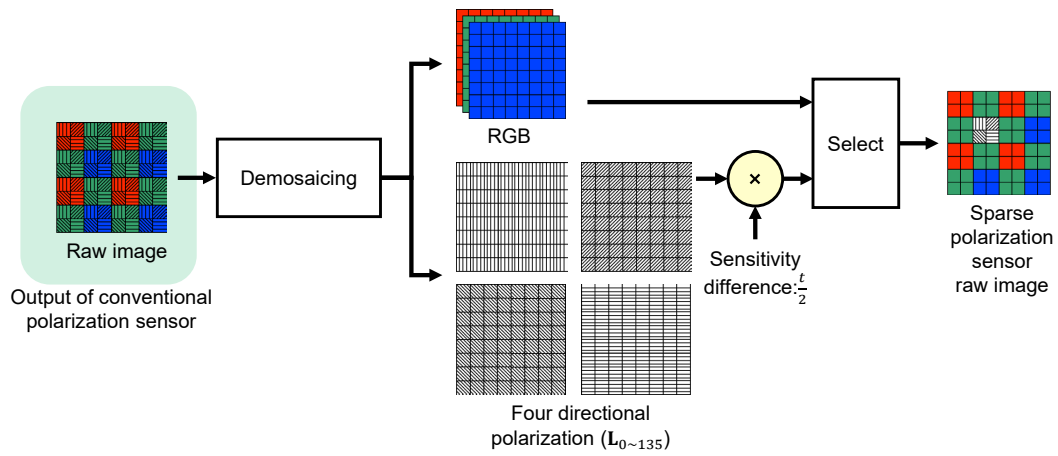

(b) Raw image generation for polarization camera dataset

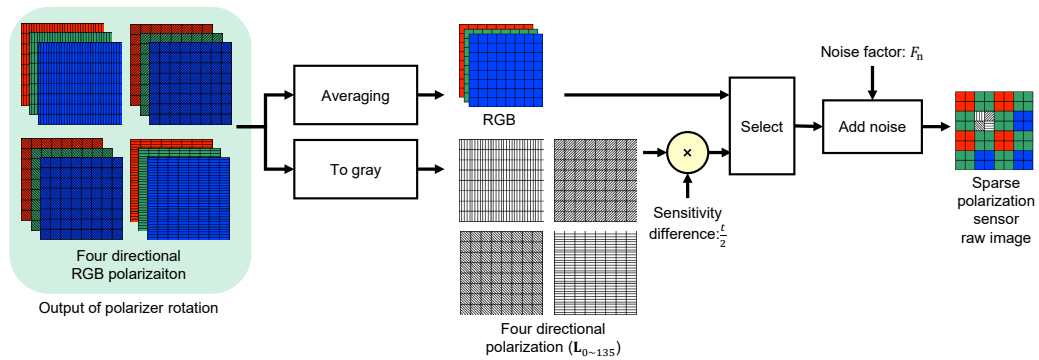

(c) Raw image generation for polarizer rotation dataset

Figure 5. Details of raw image generation for the: (a) synthetic, (b) polarization camera, and (c) polarizer rotation datasets.

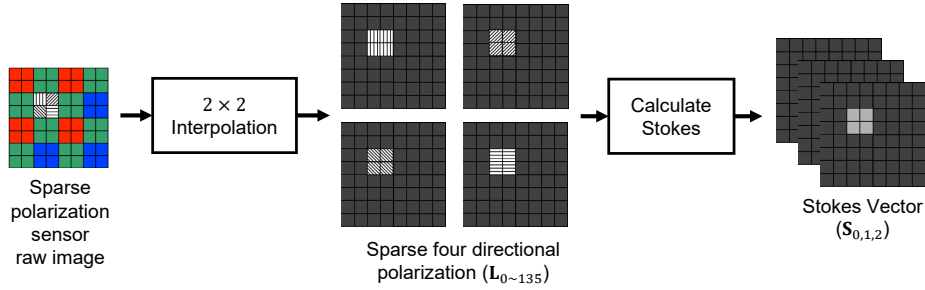

Figure 6. **Interpolation of polarization pixels.** Pixel values for four polarization angles are interpolated in a  $2 \times 2$  region where polarization pixels are present.

Table 2. **Ablation study.** Additional results.

| Polarization sensor | r                           | Operation                   | $S_{0,1,2}$<br>RMSE ↓<br>[ $\times 10^{-3}$ ] | $S_{1,2}$<br>RMSE ↓<br>[ $\times 10^{-3}$ ] | DoLP<br>PSNR ↑<br>[dB] | AoLP<br>Error ↓<br>[ $^{\circ}$ ] |
|---------------------|-----------------------------|-----------------------------|-----------------------------------------------|---------------------------------------------|------------------------|-----------------------------------|
| Conventional        | 0                           | Baseline (four polar comp.) | 12.830                                        | 11.068                                      | 17.32                  | 24.99                             |
|                     |                             | + SNA ( $S_{1,2}$ comp.)    | 14.563                                        | 4.101                                       | 26.54                  | 12.97                             |
|                     |                             | + RGBRN                     | 6.931                                         | 3.909                                       | 26.10                  | 14.77                             |
|                     |                             | + FTB                       | <b>6.915</b>                                  | 3.865                                       | 26.92                  | 13.06                             |
|                     |                             | + AFA                       | <b>6.915</b>                                  | <b>3.854</b>                                | <b>27.22</b>           | <b>12.35</b>                      |
| Sparse              | $\frac{1}{4}$               | Baseline (four polar comp.) | 10.948                                        | 10.574                                      | 16.57                  | 31.70                             |
|                     |                             | + SNA ( $S_{1,2}$ comp.)    | 10.328                                        | 4.046                                       | 26.94                  | <b>12.31</b>                      |
|                     |                             | + RGBRN                     | 4.974                                         | 3.979                                       | 26.75                  | 13.43                             |
|                     |                             | + FTB                       | 4.952                                         | 3.952                                       | 26.81                  | 13.14                             |
|                     |                             | + AFA                       | <b>4.881</b>                                  | <b>3.824</b>                                | <b>27.41</b>           | 12.36                             |
|                     | $\frac{1}{16}$              | Baseline (four polar comp.) | 9.099                                         | 8.952                                       | 18.76                  | 29.05                             |
|                     |                             | + SNA ( $S_{1,2}$ comp.)    | 8.568                                         | 4.304                                       | 26.25                  | <b>13.30</b>                      |
|                     |                             | + RGBRN                     | 4.752                                         | 4.216                                       | 26.45                  | 13.50                             |
|                     |                             | + FTB                       | 4.727                                         | 4.186                                       | 26.42                  | 13.61                             |
|                     |                             | + AFA                       | <b>4.707</b>                                  | <b>4.151</b>                                | <b>26.48</b>           | 13.95                             |
| $\frac{1}{64}$      | Baseline (four polar comp.) | 8.746                       | 8.794                                         | 17.27                                       | 32.98                  |                                   |
|                     | + SNA ( $S_{1,2}$ comp.)    | 8.110                       | 4.952                                         | 24.80                                       | 16.02                  |                                   |
|                     | + RGBRN                     | 5.033                       | <b>4.791</b>                                  | <b>25.19</b>                                | <b>15.56</b>           |                                   |
|                     | + FTB                       | 5.080                       | 4.853                                         | 25.01                                       | 16.04                  |                                   |
|                     | + AFA                       | <b>5.032</b>                | 4.801                                         | 24.85                                       | 17.39                  |                                   |

Table 3. Comparison of the results obtained after replacing PCN with depth completion and upsampling networks in our network architecture. Additional results.

| Polarization sensor | $r$            | Method   | $S_{0,1,2}$<br>RMSE ↓<br>[ $\times 10^{-3}$ ] | $S_{1,2}$<br>RMSE ↓<br>[ $\times 10^{-3}$ ] | DoLP<br>PSNR ↑<br>[dB] | AoLP<br>Error ↓<br>[ $^{\circ}$ ] | Runtime<br>[ms] |
|---------------------|----------------|----------|-----------------------------------------------|---------------------------------------------|------------------------|-----------------------------------|-----------------|
| Conventional        | 0              | UNet     | 6.915                                         | 4.013                                       | 26.68                  | 12.97                             | 40.8            |
|                     |                | U2Net    | 7.120                                         | 4.277                                       | 25.11                  | 15.42                             | 160.6           |
|                     |                | FDSR     | 7.032                                         | 4.223                                       | 26.81                  | <b>12.06</b>                      | 35.6            |
|                     |                | GuideNet | 6.907                                         | 4.048                                       | 25.77                  | 15.04                             | 61.8            |
|                     |                | NLSPN    | <b>6.894</b>                                  | 3.879                                       | 26.37                  | 14.73                             | 172.8           |
|                     |                | Ours     | 6.915                                         | <b>3.854</b>                                | <b>27.22</b>           | 12.35                             | 50.9            |
| Sparse              | $\frac{1}{4}$  | UNet     | 4.986                                         | 4.013                                       | 26.46                  | 13.91                             | 41.0            |
|                     |                | U2Net    | 5.179                                         | 4.306                                       | 25.12                  | 16.17                             | 162.1           |
|                     |                | FDSR     | 5.191                                         | 4.389                                       | 25.87                  | 14.02                             | 35.7            |
|                     |                | GuideNet | 4.984                                         | 4.021                                       | 25.79                  | 14.33                             | 71.3            |
|                     |                | NLSPN    | <b>4.848</b>                                  | <b>3.788</b>                                | 27.40                  | 13.13                             | 172.9           |
|                     |                | Ours     | 4.881                                         | 3.824                                       | <b>27.41</b>           | <b>12.36</b>                      | 50.6            |
|                     | $\frac{1}{16}$ | UNet     | 4.974                                         | 4.568                                       | 25.00                  | 16.31                             | 41.0            |
|                     |                | U2Net    | 5.537                                         | 5.224                                       | 23.90                  | 19.11                             | 158.8           |
|                     |                | FDSR     | 5.128                                         | 4.837                                       | 25.12                  | 15.48                             | 36.0            |
|                     |                | GuideNet | 4.859                                         | 4.390                                       | 25.59                  | 15.62                             | 68.7            |
|                     |                | NLSPN    | 4.905                                         | 4.470                                       | 23.97                  | 20.20                             | 172.8           |
|                     |                | Ours     | <b>4.707</b>                                  | <b>4.151</b>                                | <b>26.48</b>           | <b>13.95</b>                      | 50.9            |
|                     | $\frac{1}{64}$ | UNet     | 6.526                                         | 6.872                                       | 21.96                  | 31.74                             | 41.1            |
|                     |                | U2Net    | 5.981                                         | 6.108                                       | 21.92                  | 25.34                             | 163.7           |
|                     |                | FDSR     | 5.570                                         | 5.615                                       | 23.84                  | 18.74                             | 35.6            |
|                     |                | GuideNet | 6.241                                         | 6.255                                       | 16.32                  | 33.34                             | 67.4            |
|                     |                | NLSPN    | 6.402                                         | 6.564                                       | 21.05                  | 26.48                             | 173.1           |
|                     |                | Ours     | <b>5.033</b>                                  | <b>4.791</b>                                | <b>25.19</b>           | <b>15.56</b>                      | 50.5            |

Table 4. Comparison between real-world (R) and synthetic (S) datasets. Additional results.

| Polarization sensor | $r$            | Data | Train size | $S_{0,1,2}$<br>RMSE ↓<br>[ $\times 10^{-3}$ ] | $S_{1,2}$<br>RMSE ↓<br>[ $\times 10^{-3}$ ] | DoLP<br>PSNR ↑<br>[dB] | AoLP<br>Error ↓<br>[ $^{\circ}$ ] |
|---------------------|----------------|------|------------|-----------------------------------------------|---------------------------------------------|------------------------|-----------------------------------|
| Conventional        | 0              | R    | 729        | 21.578                                        | 4.731                                       | 25.60                  | 13.88                             |
|                     |                | S    | 729        | 8.836                                         | 5.177                                       | 24.47                  | 15.62                             |
|                     |                | S    | 10000      | 7.093                                         | 4.055                                       | 26.69                  | <b>12.29</b>                      |
|                     |                | R+S  | 10729      | <b>6.915</b>                                  | <b>3.854</b>                                | <b>27.22</b>           | 12.35                             |
| Sparse              | $\frac{1}{4}$  | R    | 729        | 11.162                                        | 5.240                                       | 25.40                  | 14.79                             |
|                     |                | S    | 729        | 6.346                                         | 5.342                                       | 24.05                  | 15.55                             |
|                     |                | S    | 10000      | 5.137                                         | 4.093                                       | 26.58                  | 13.11                             |
|                     |                | R+S  | 10729      | <b>4.881</b>                                  | <b>3.824</b>                                | <b>27.41</b>           | <b>12.36</b>                      |
|                     | $\frac{1}{16}$ | R    | 729        | 7.257                                         | 5.809                                       | 24.71                  | 15.76                             |
|                     |                | S    | 729        | 6.304                                         | 5.889                                       | 23.32                  | 18.38                             |
|                     |                | S    | 10000      | 4.975                                         | 4.471                                       | 25.81                  | 14.41                             |
|                     |                | R+S  | 10729      | <b>4.707</b>                                  | <b>4.151</b>                                | <b>26.48</b>           | <b>13.95</b>                      |
|                     | $\frac{1}{64}$ | R    | 729        | 6.762                                         | 6.400                                       | 23.84                  | 17.86                             |
|                     |                | S    | 729        | 6.718                                         | 6.629                                       | 22.43                  | 21.11                             |
|                     |                | S    | 10000      | 5.431                                         | 5.305                                       | 24.57                  | 16.35                             |
|                     |                | R+S  | 10729      | <b>5.033</b>                                  | <b>4.791</b>                                | <b>25.19</b>           | <b>15.56</b>                      |

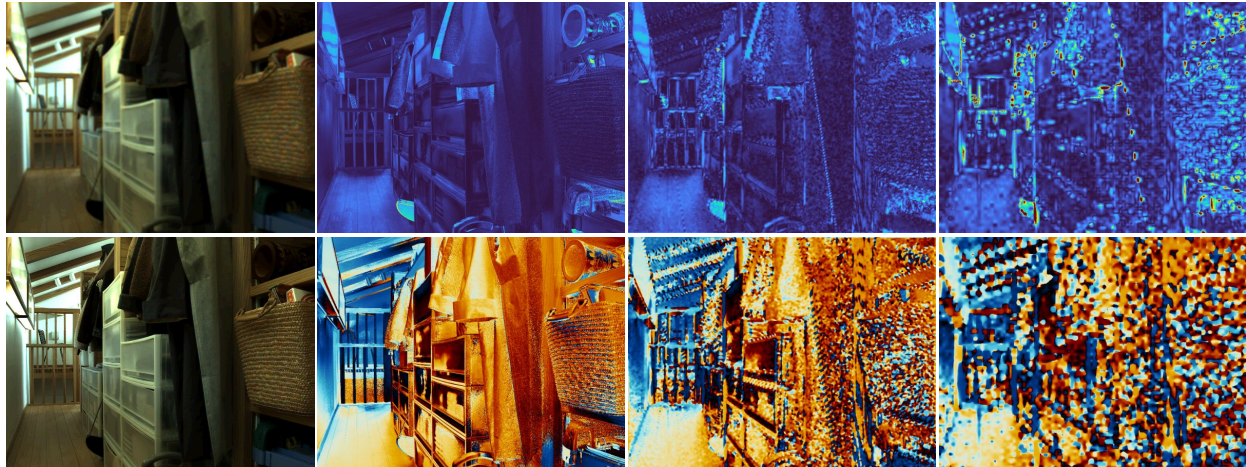

(Top) Conventional RGB  
(Bottom) Our RGB

(a) Ground truth

(b) Conventional

(c) Sparse + Bilinear

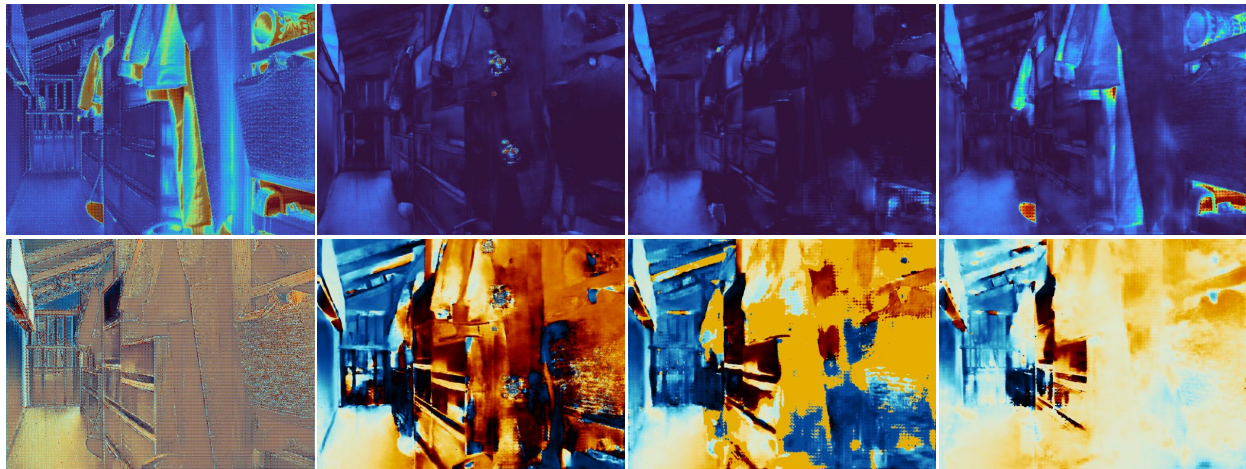

(d) Sparse + Eqn. 2  
with PCN (Ours)

(e) Sparse + Eqn. 3  
with PCN (Ours)

(f) Sparse + SNA  
with UNet

(g) Sparse + SNA  
with U2Net

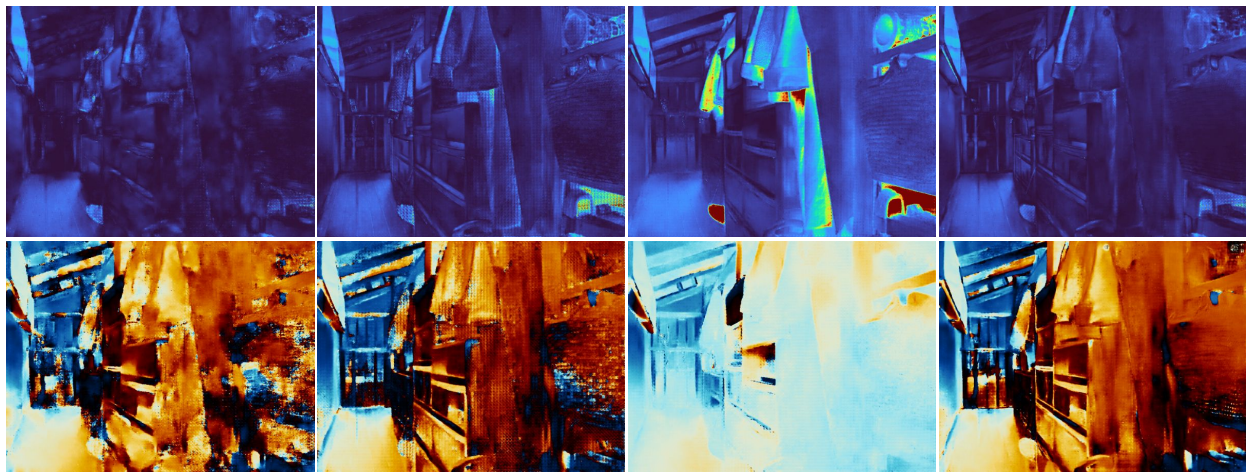

(h) Sparse + SNA  
with FDSR

(i) Sparse + SNA  
with GuideNet

(j) Sparse + SNA  
with NLSPN

(k) Sparse + SNA  
with PCN (Ours)

Figure 7. **Scene1: Comparison with other methods.** Evaluation at  $r = 1/16$ . The top is DoLP and the bottom is AoLP.



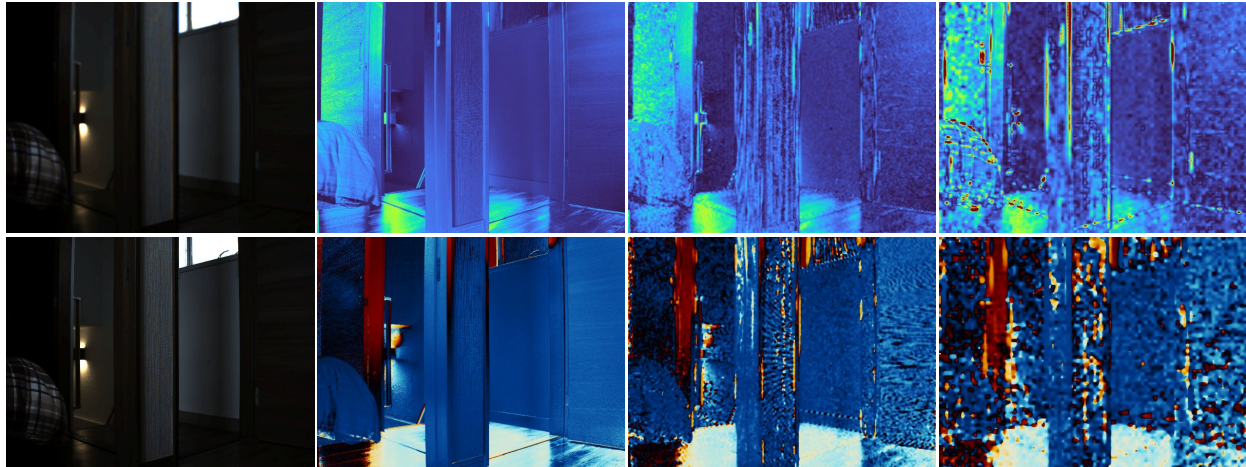

(Top) Conventional RGB  
(Bottom) Our RGB

(a) Ground truth

(b) Conventional

(c) Sparse + Bilinear

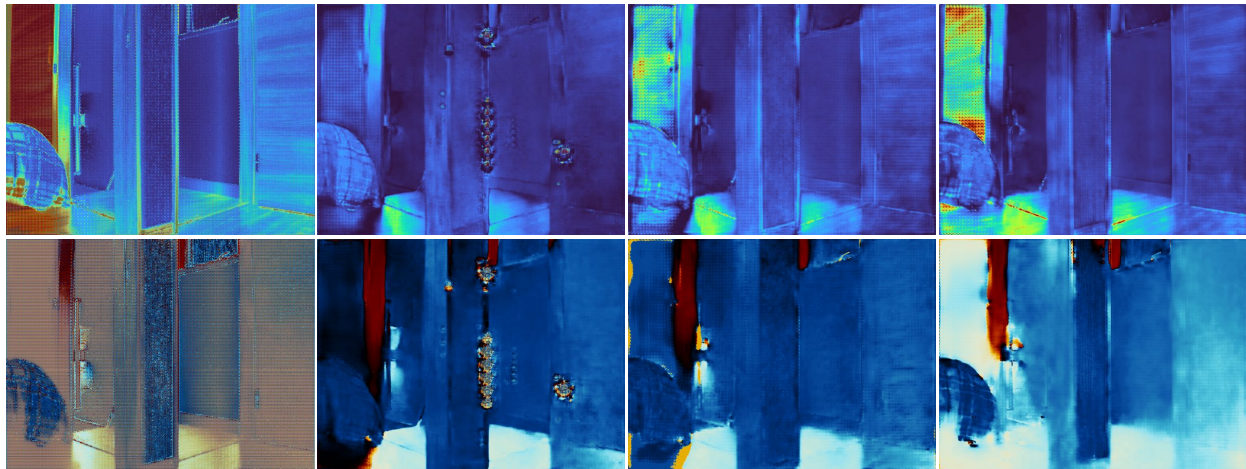

(d) Sparse + Eqn. 2  
with PCN (Ours)

(e) Sparse + Eqn. 3  
with PCN (Ours)

(f) Sparse + SNA  
with UNet

(g) Sparse + SNA  
with U2Net

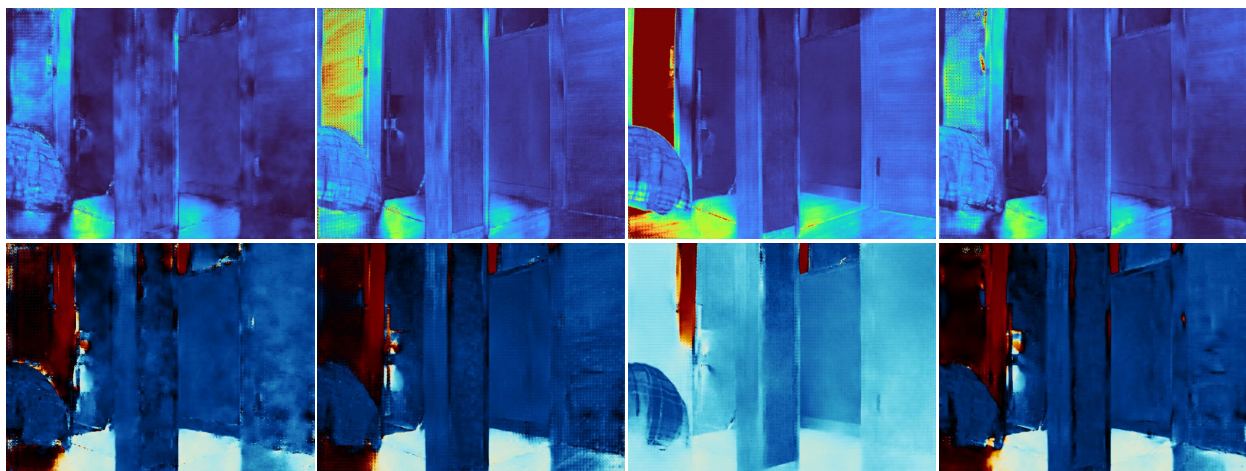

(h) Sparse + SNA  
with FDSR

(i) Sparse + SNA  
with GuideNet

(j) Sparse + SNA  
with NLSPN

(k) Sparse + SNA  
with PCN (Ours)

Figure 8. **Scene2: Comparison with other methods.** Evaluation at  $r = 1/16$ . The top is DoLP and the bottom is AoLP.

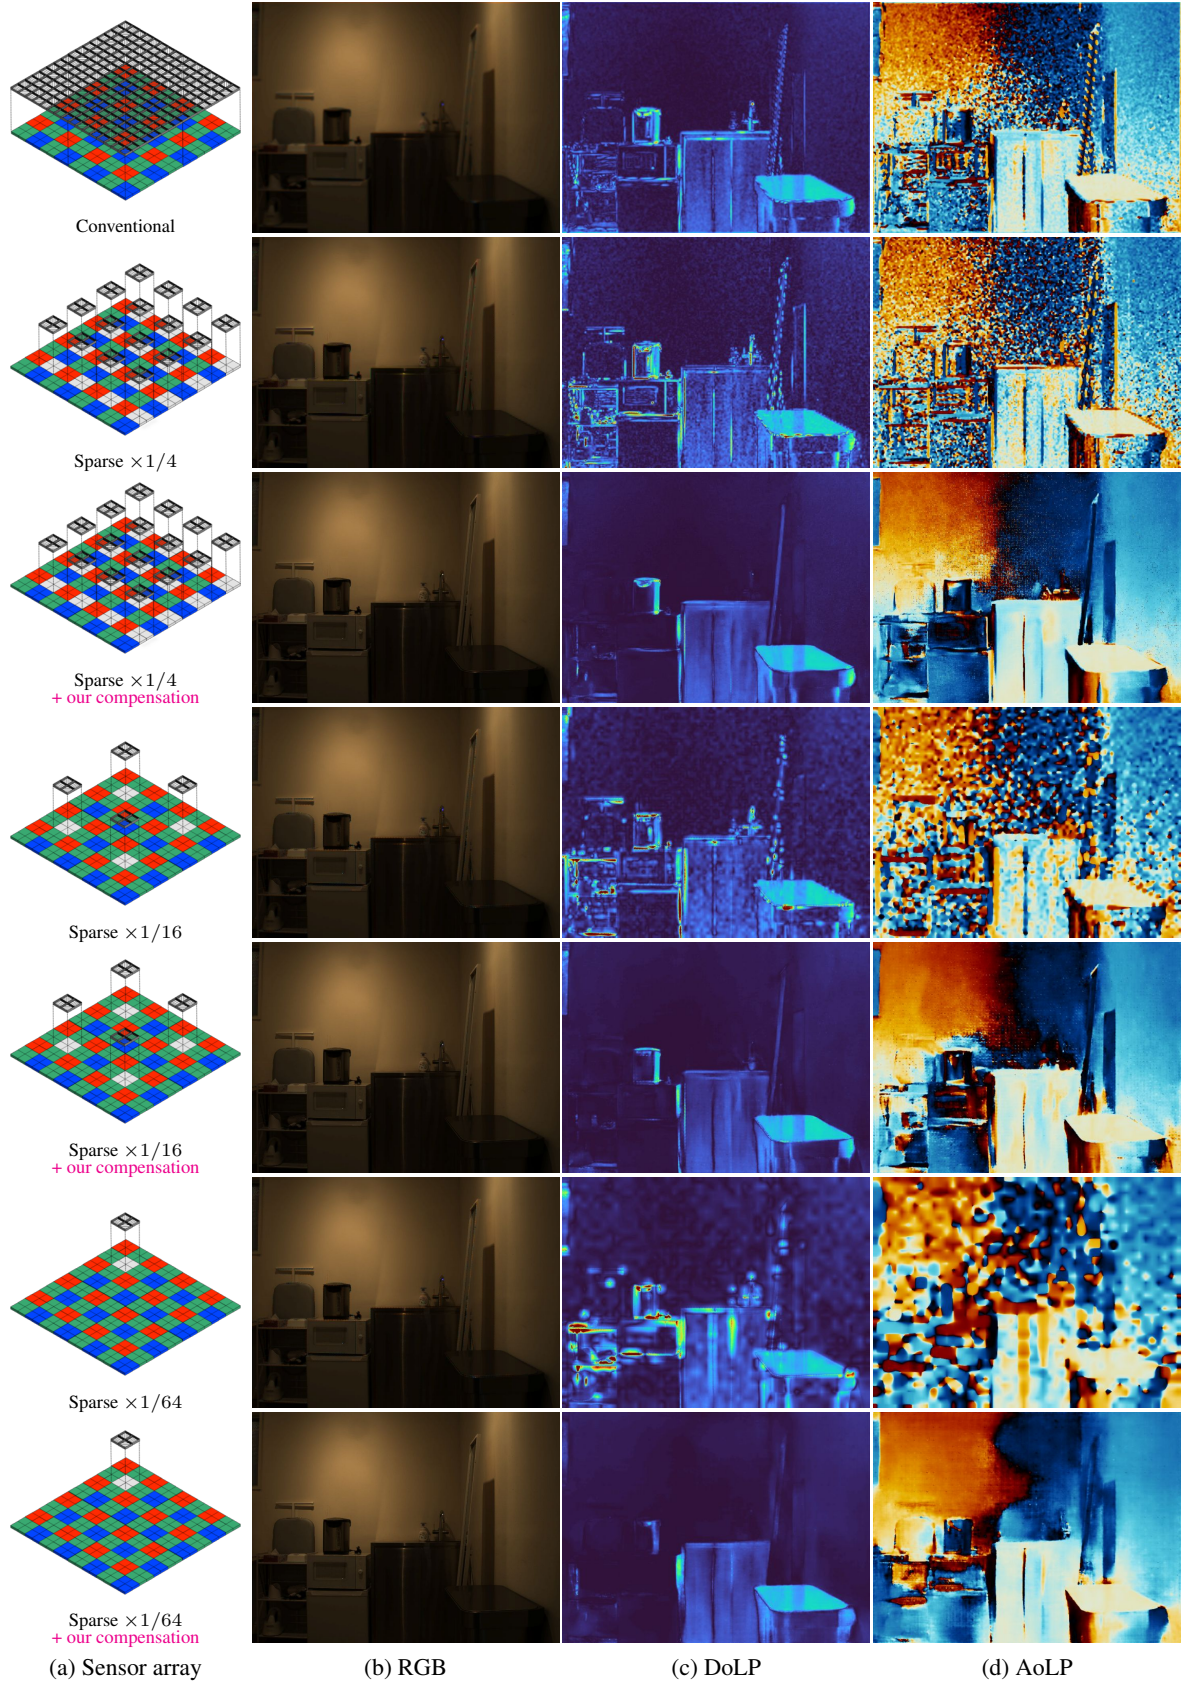

Figure 9. **Scene1: Comprehensive qualitative evaluation of conventional and sparse polarization sensors.** The effectiveness of our compensation is qualitatively demonstrated.

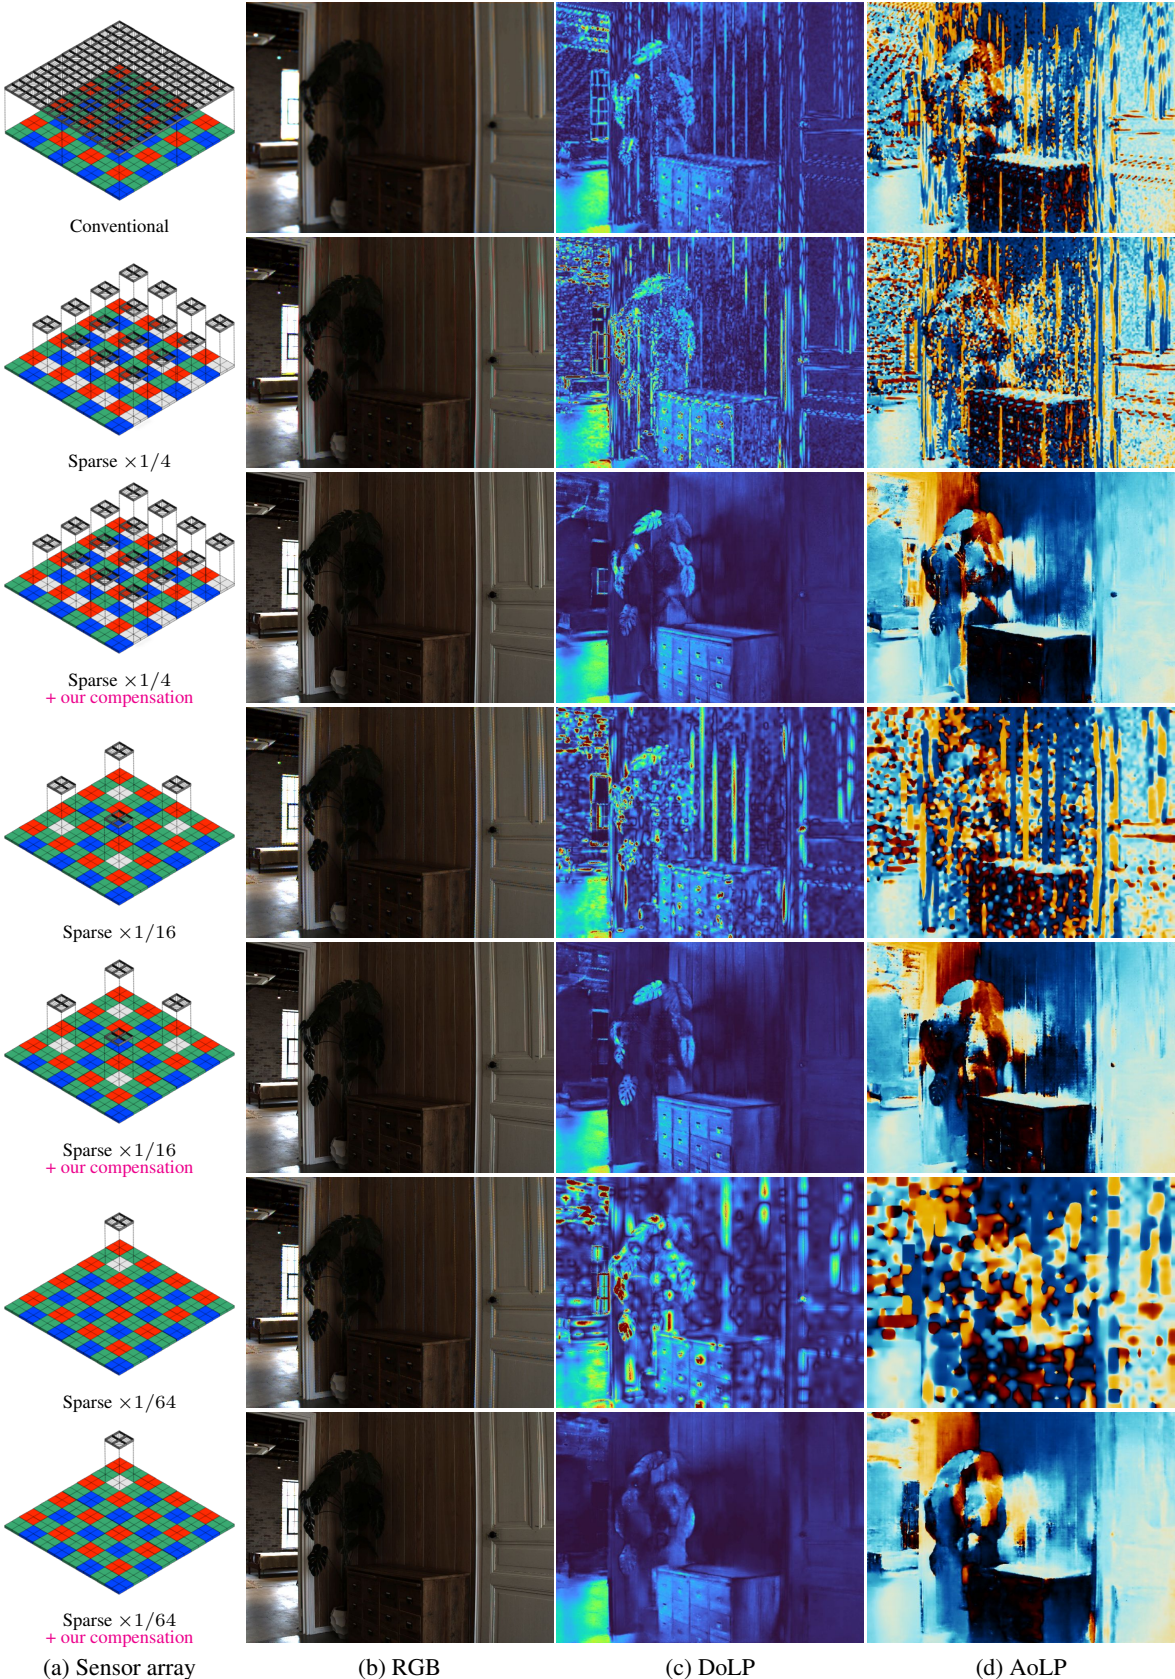

Figure 10. **Scene2: Comprehensive qualitative evaluation of conventional and sparse polarization sensors.** The effectiveness of our compensation is qualitatively demonstrated.

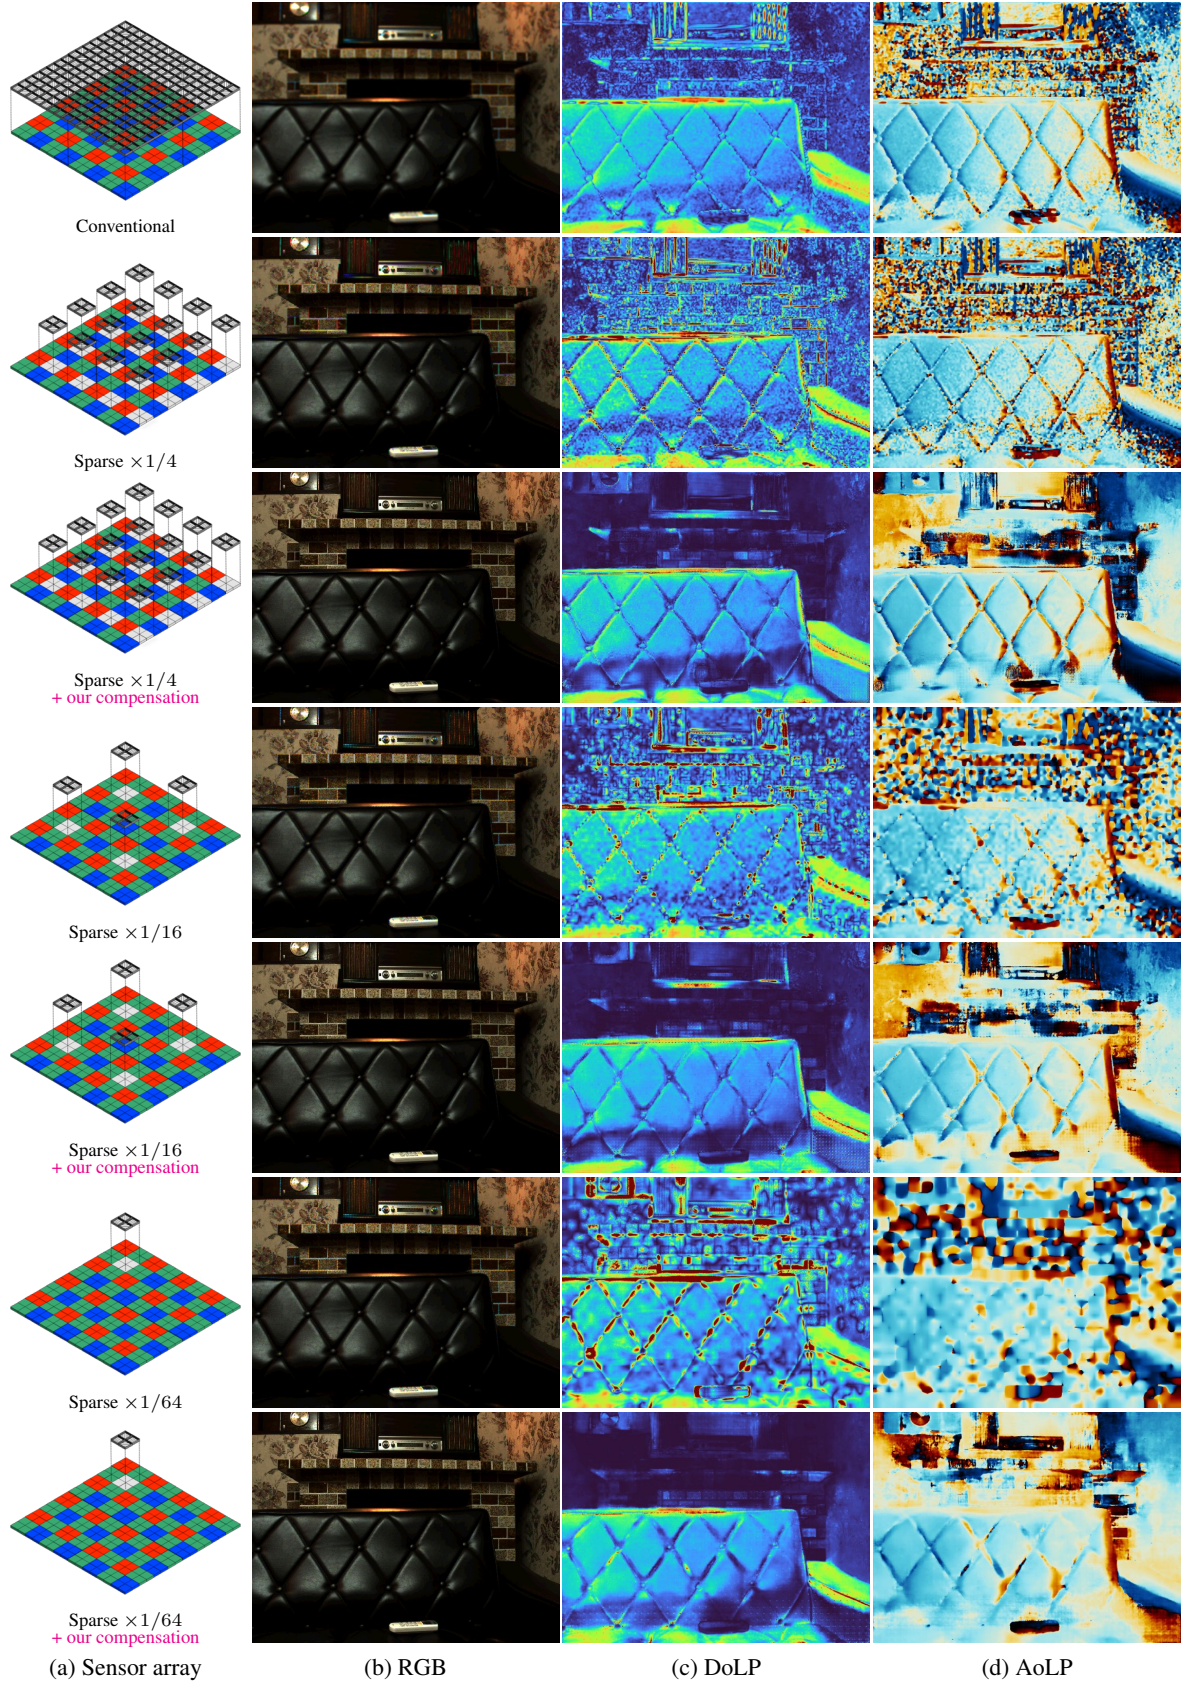

Figure 11. **Scene3: Comprehensive qualitative evaluation of conventional and sparse polarization sensors.** The effectiveness of our compensation is qualitatively demonstrated.

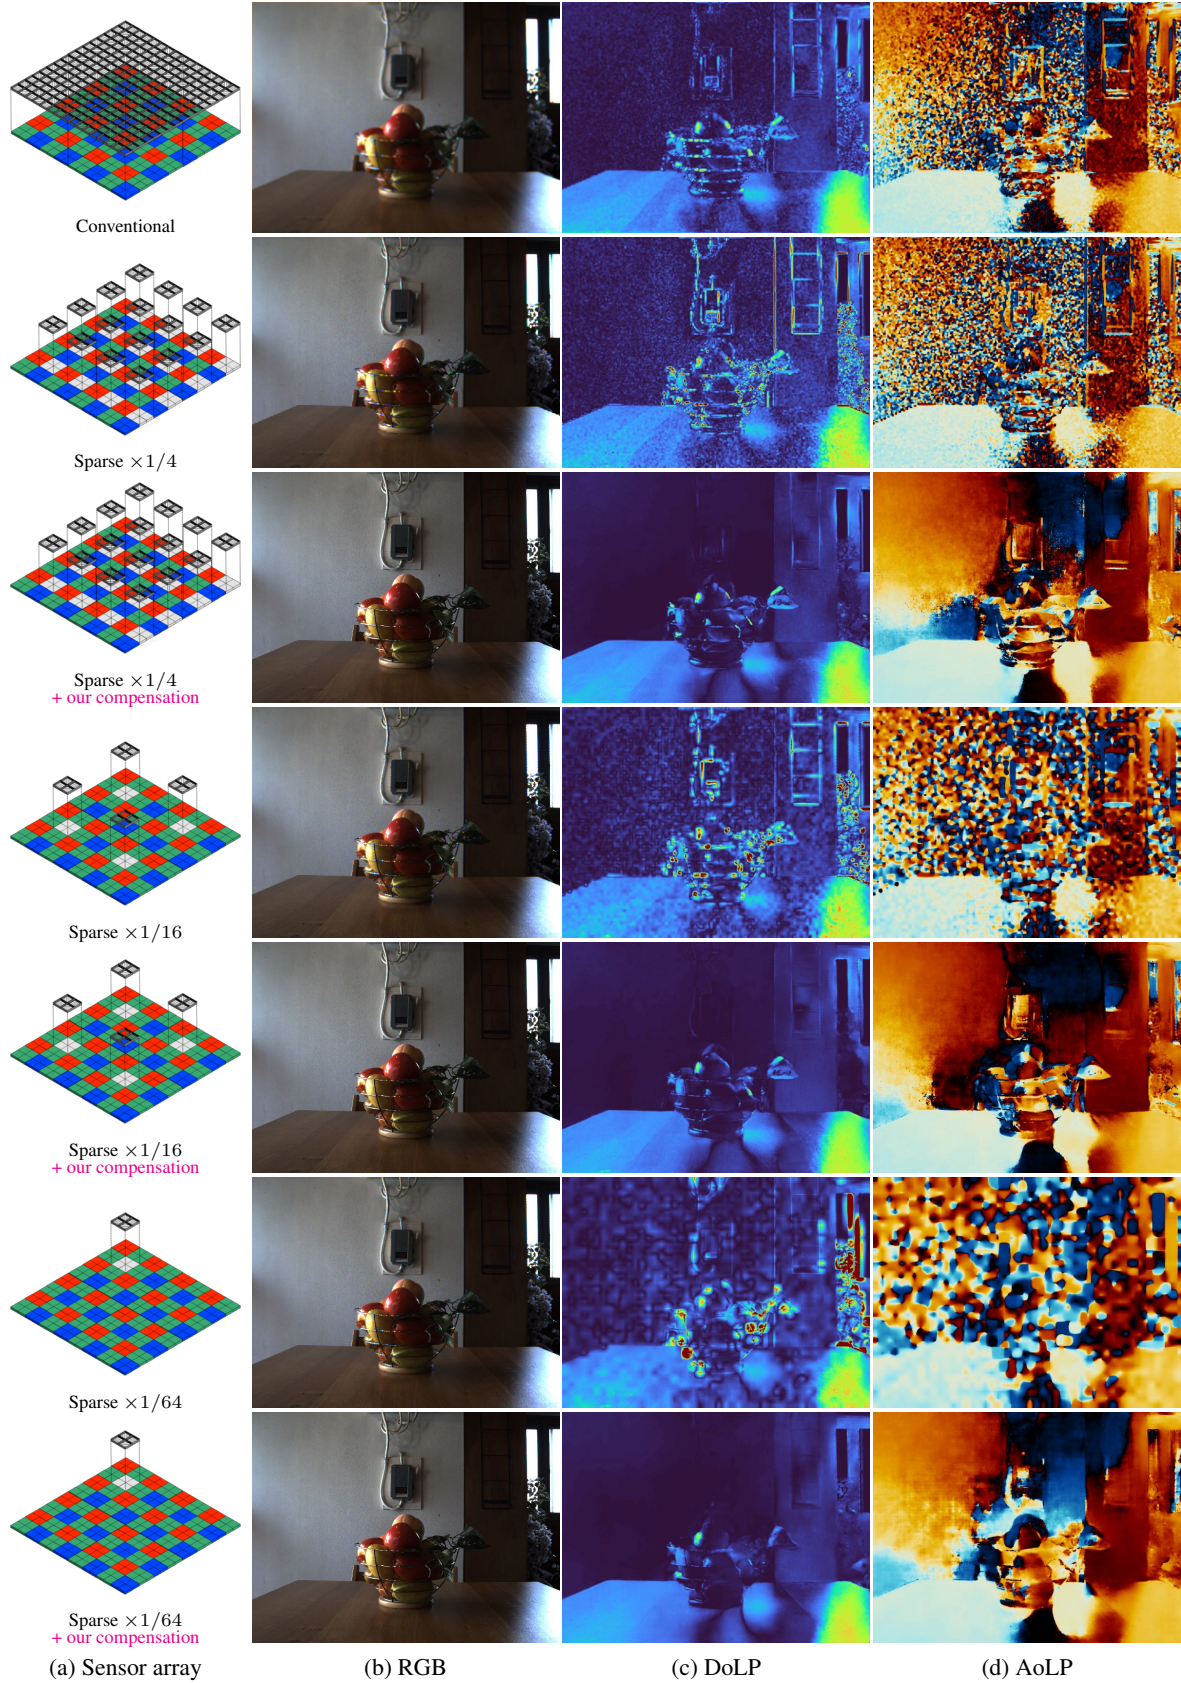

Figure 12. **Scene4: Comprehensive qualitative evaluation of conventional and sparse polarization sensors.** The effectiveness of our compensation is qualitatively demonstrated.

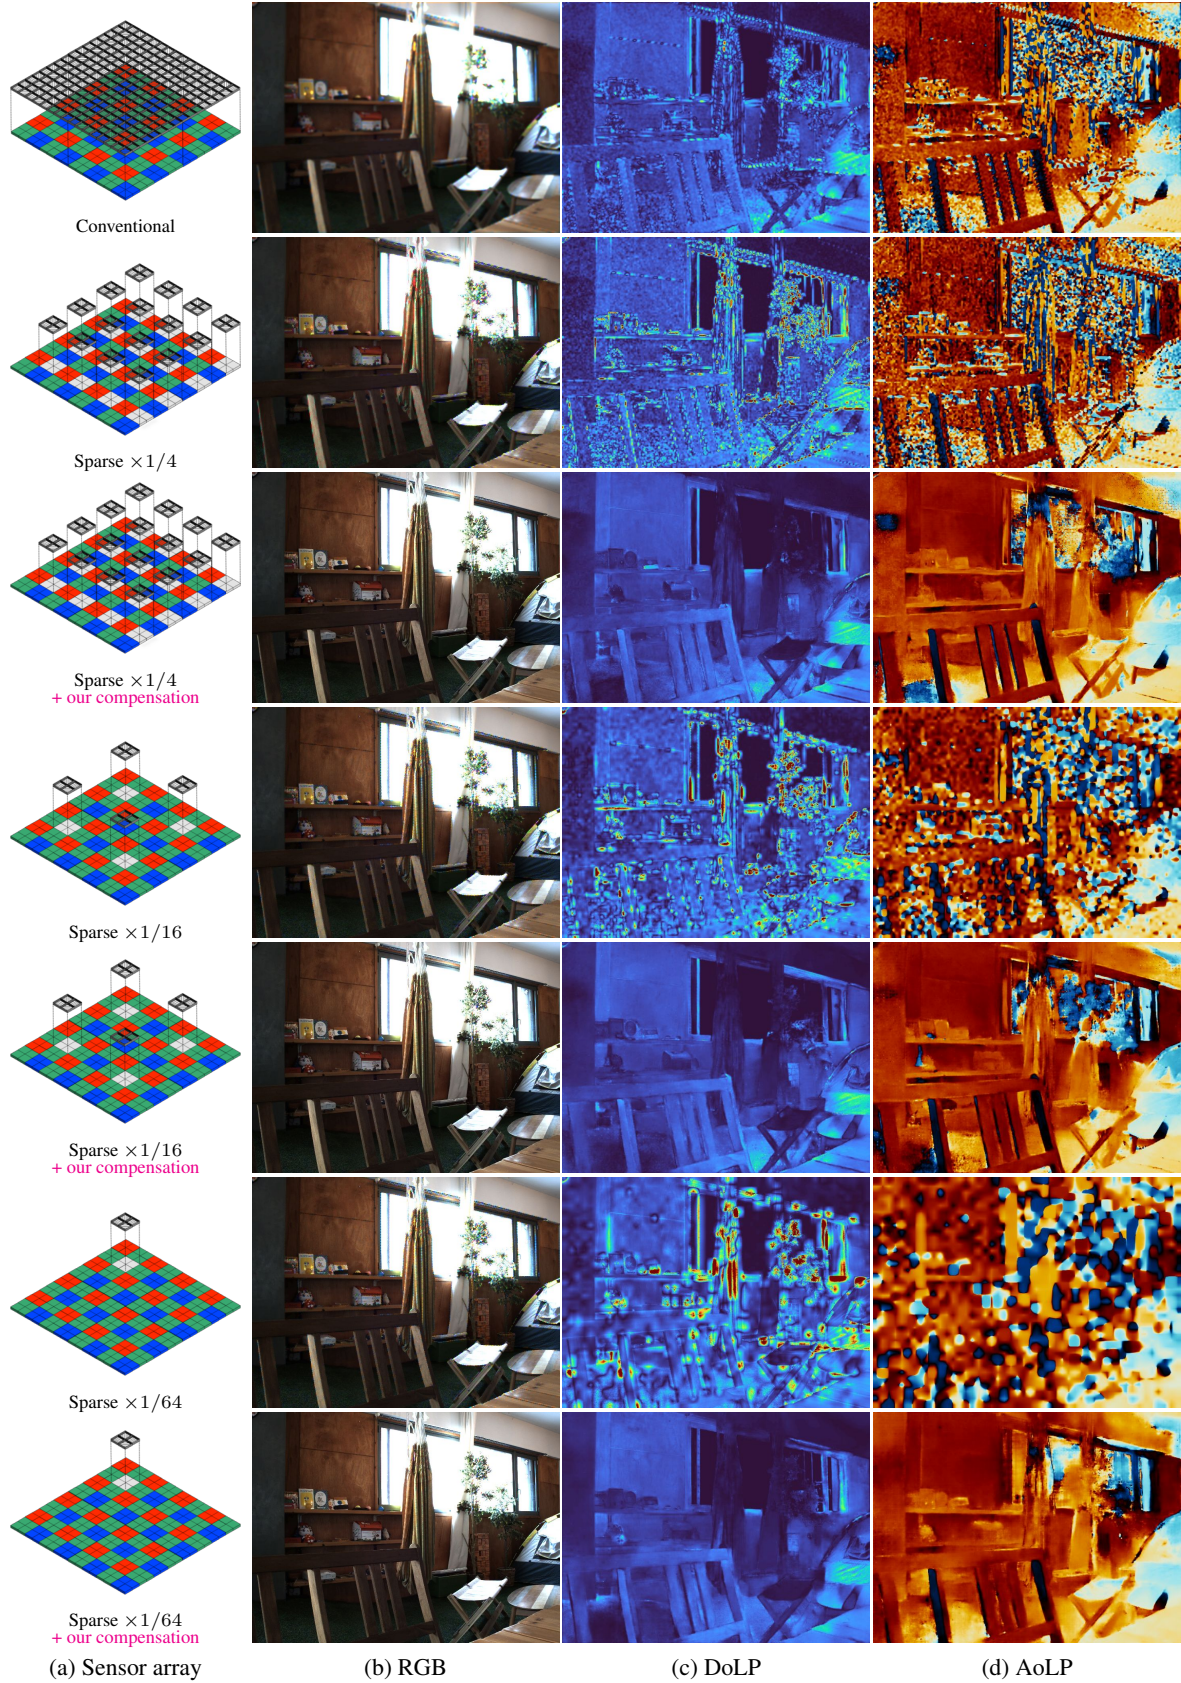

Figure 13. **Scene5: Comprehensive qualitative evaluation of conventional and sparse polarization sensors.** The effectiveness of our compensation is qualitatively demonstrated.

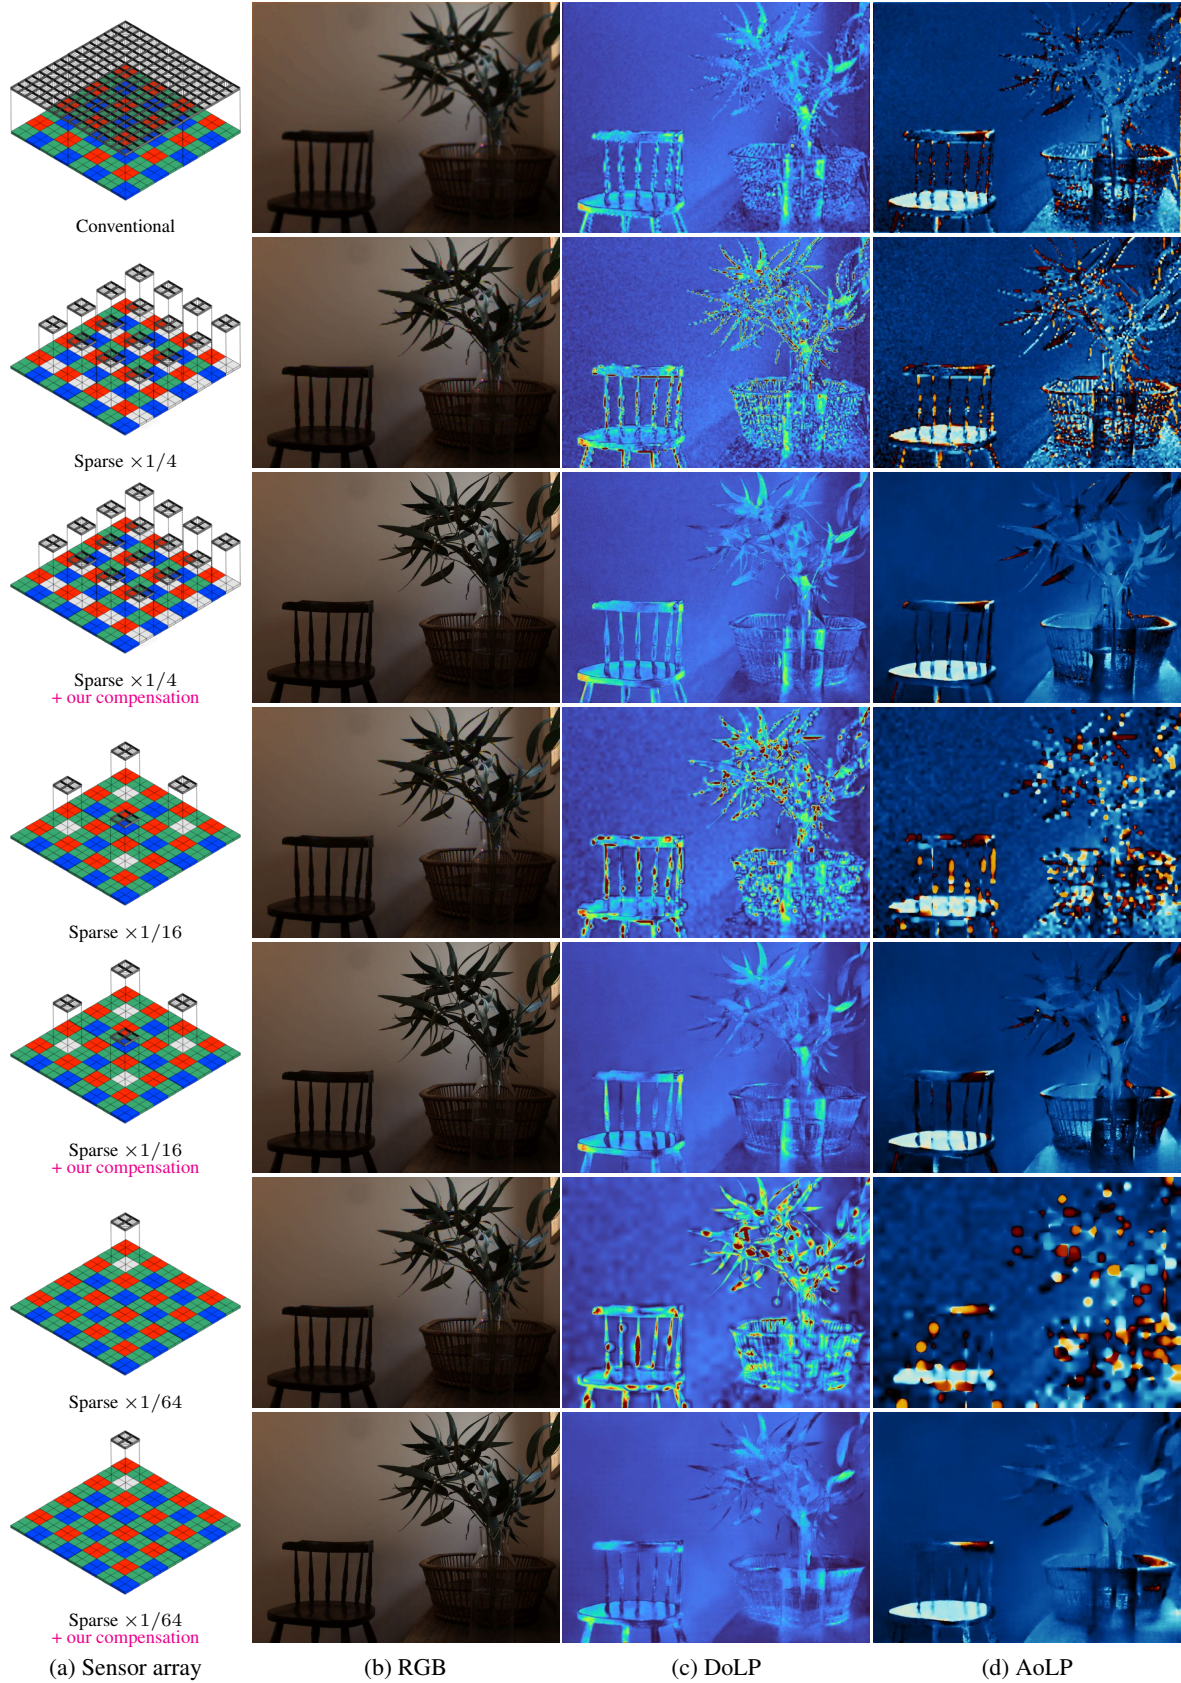

Figure 14. **Scene6: Comprehensive qualitative evaluation of conventional and sparse polarization sensors.** The effectiveness of our compensation is qualitatively demonstrated.

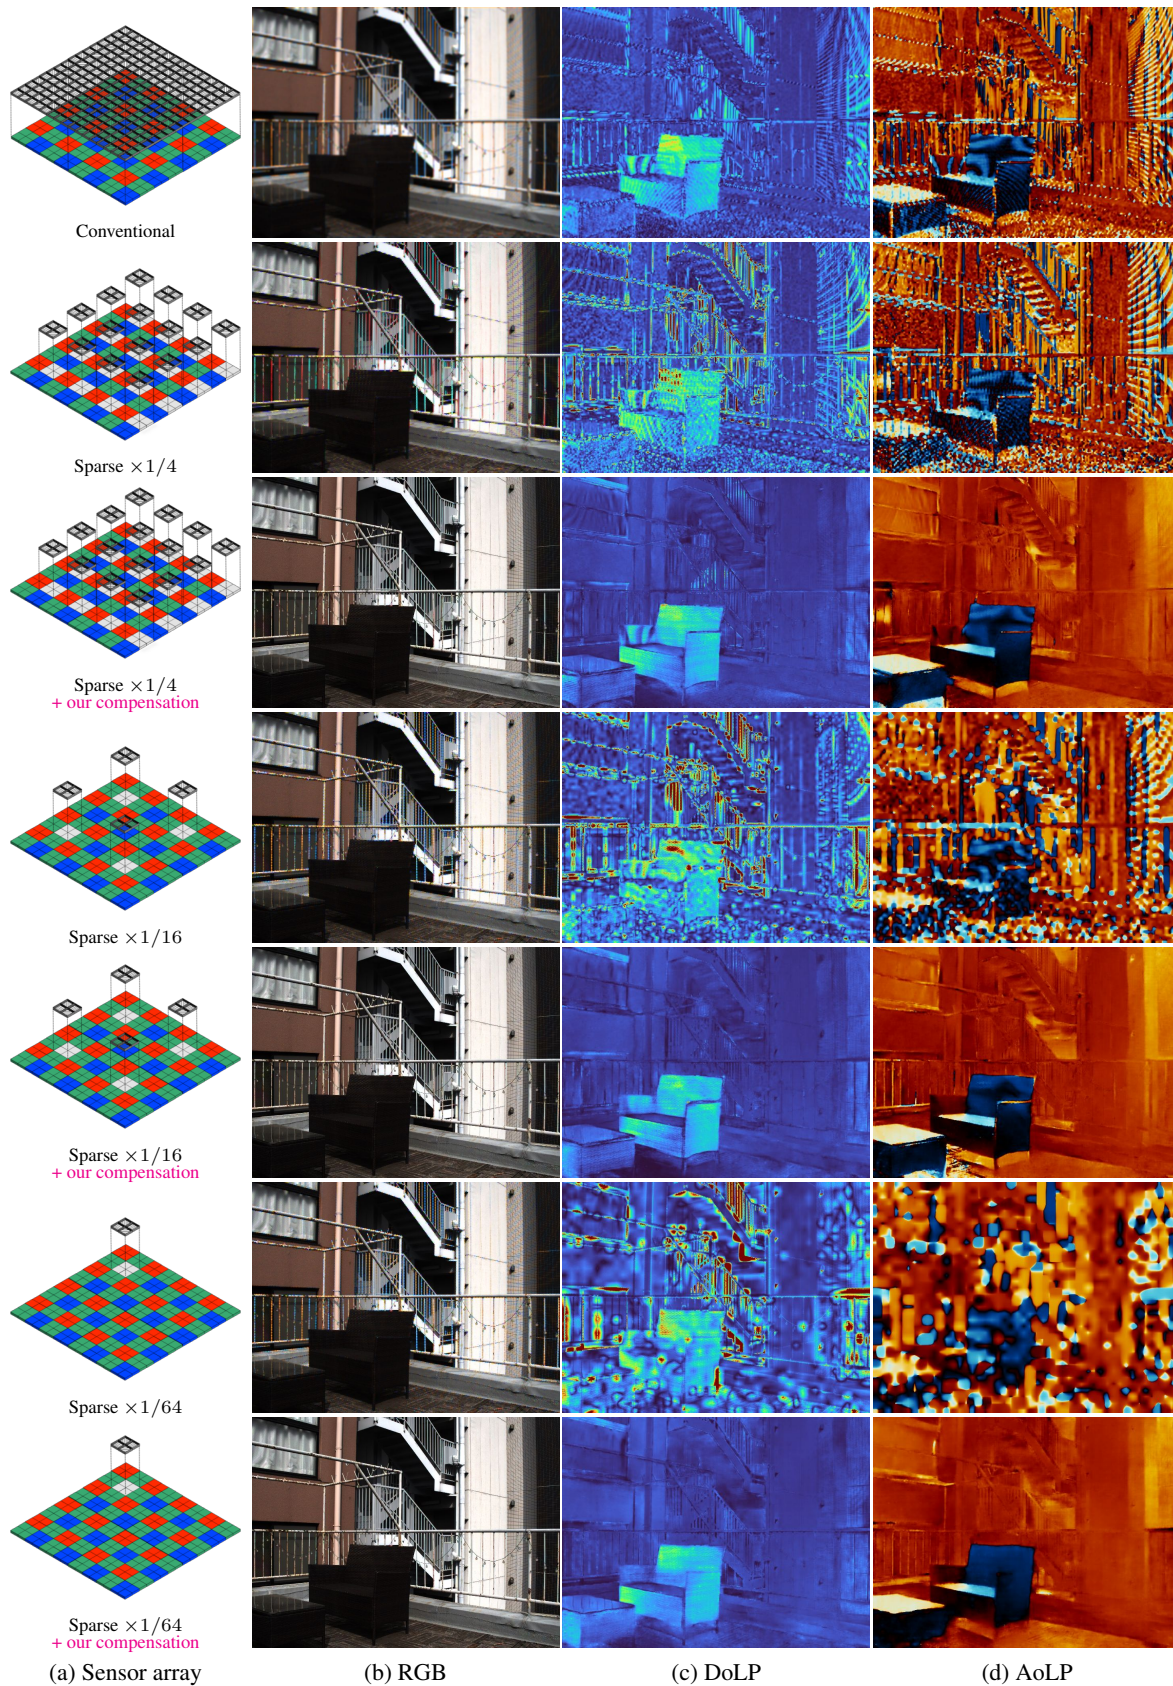

Figure 15. **Scene7: Comprehensive qualitative evaluation of conventional and sparse polarization sensors.** The effectiveness of our compensation is qualitatively demonstrated.



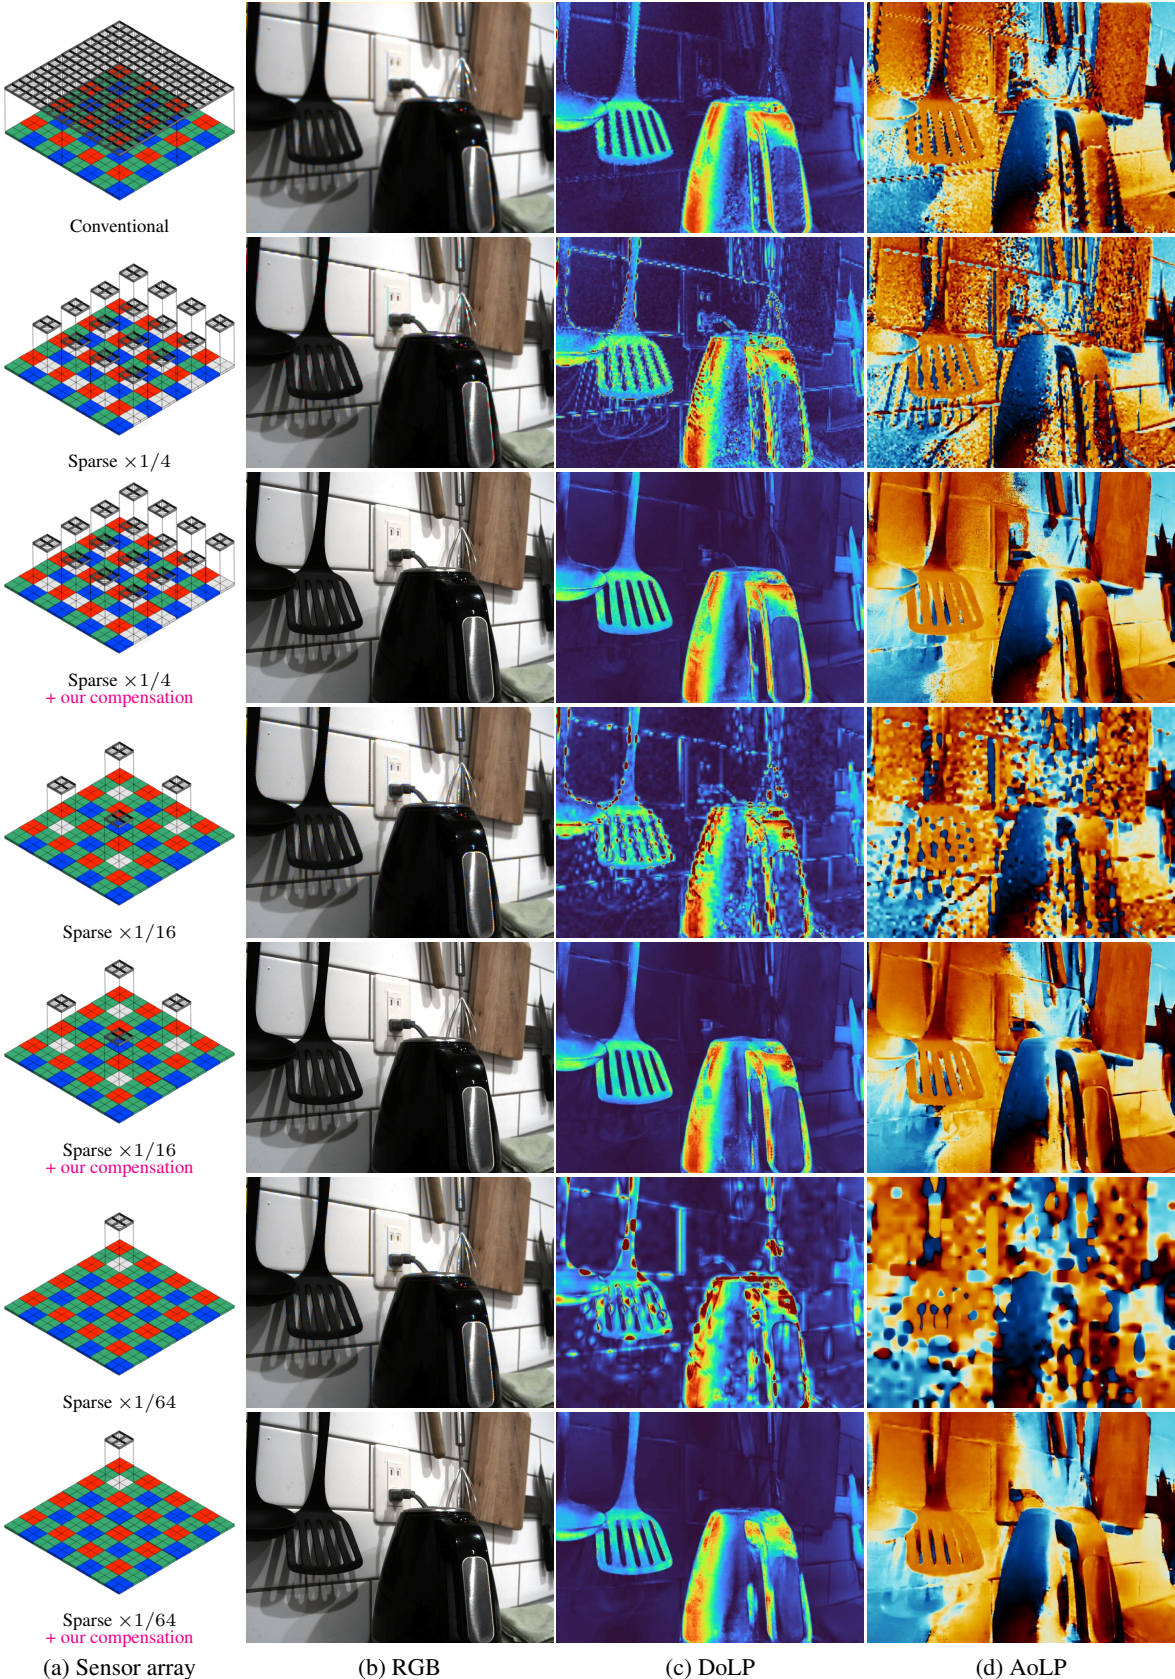

Figure 16. **Scene8: Comprehensive qualitative evaluation of conventional and sparse polarization sensors.** The effectiveness of our compensation is qualitatively demonstrated.

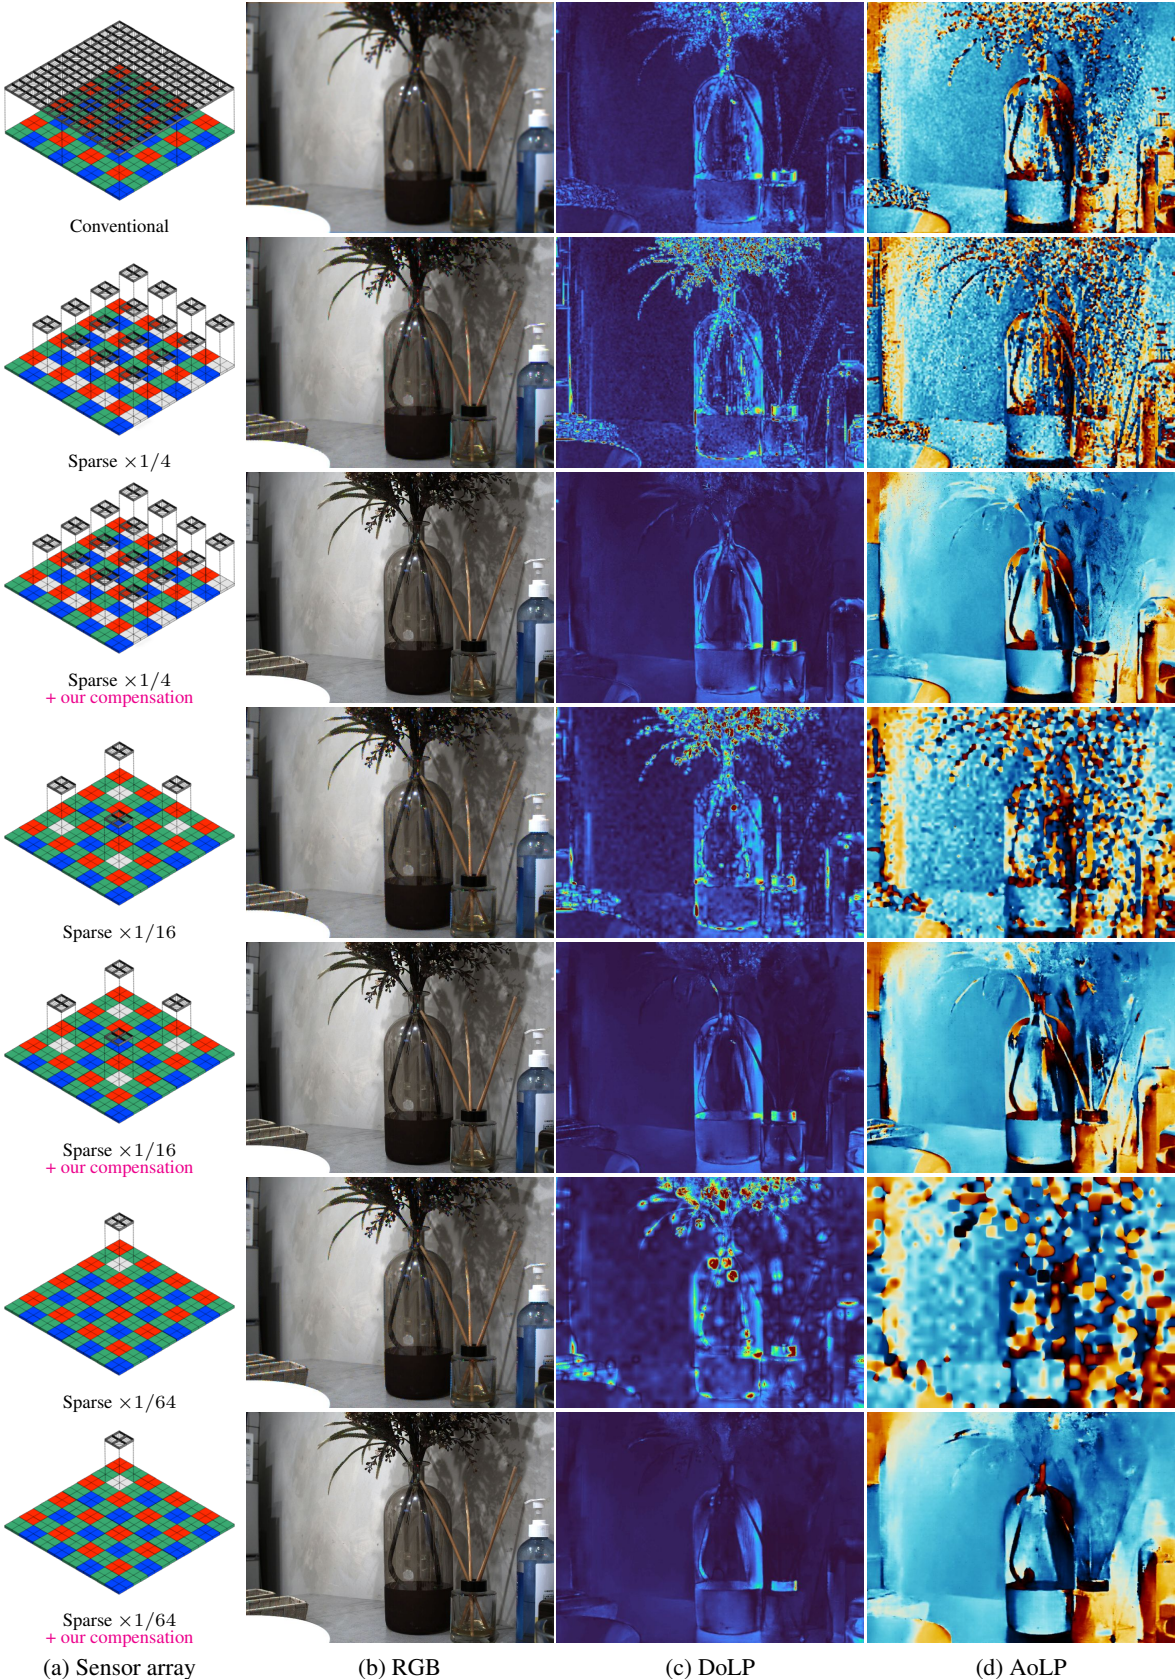

Figure 17. **Scene9: Comprehensive qualitative evaluation of conventional and sparse polarization sensors.** The effectiveness of our compensation is qualitatively demonstrated.

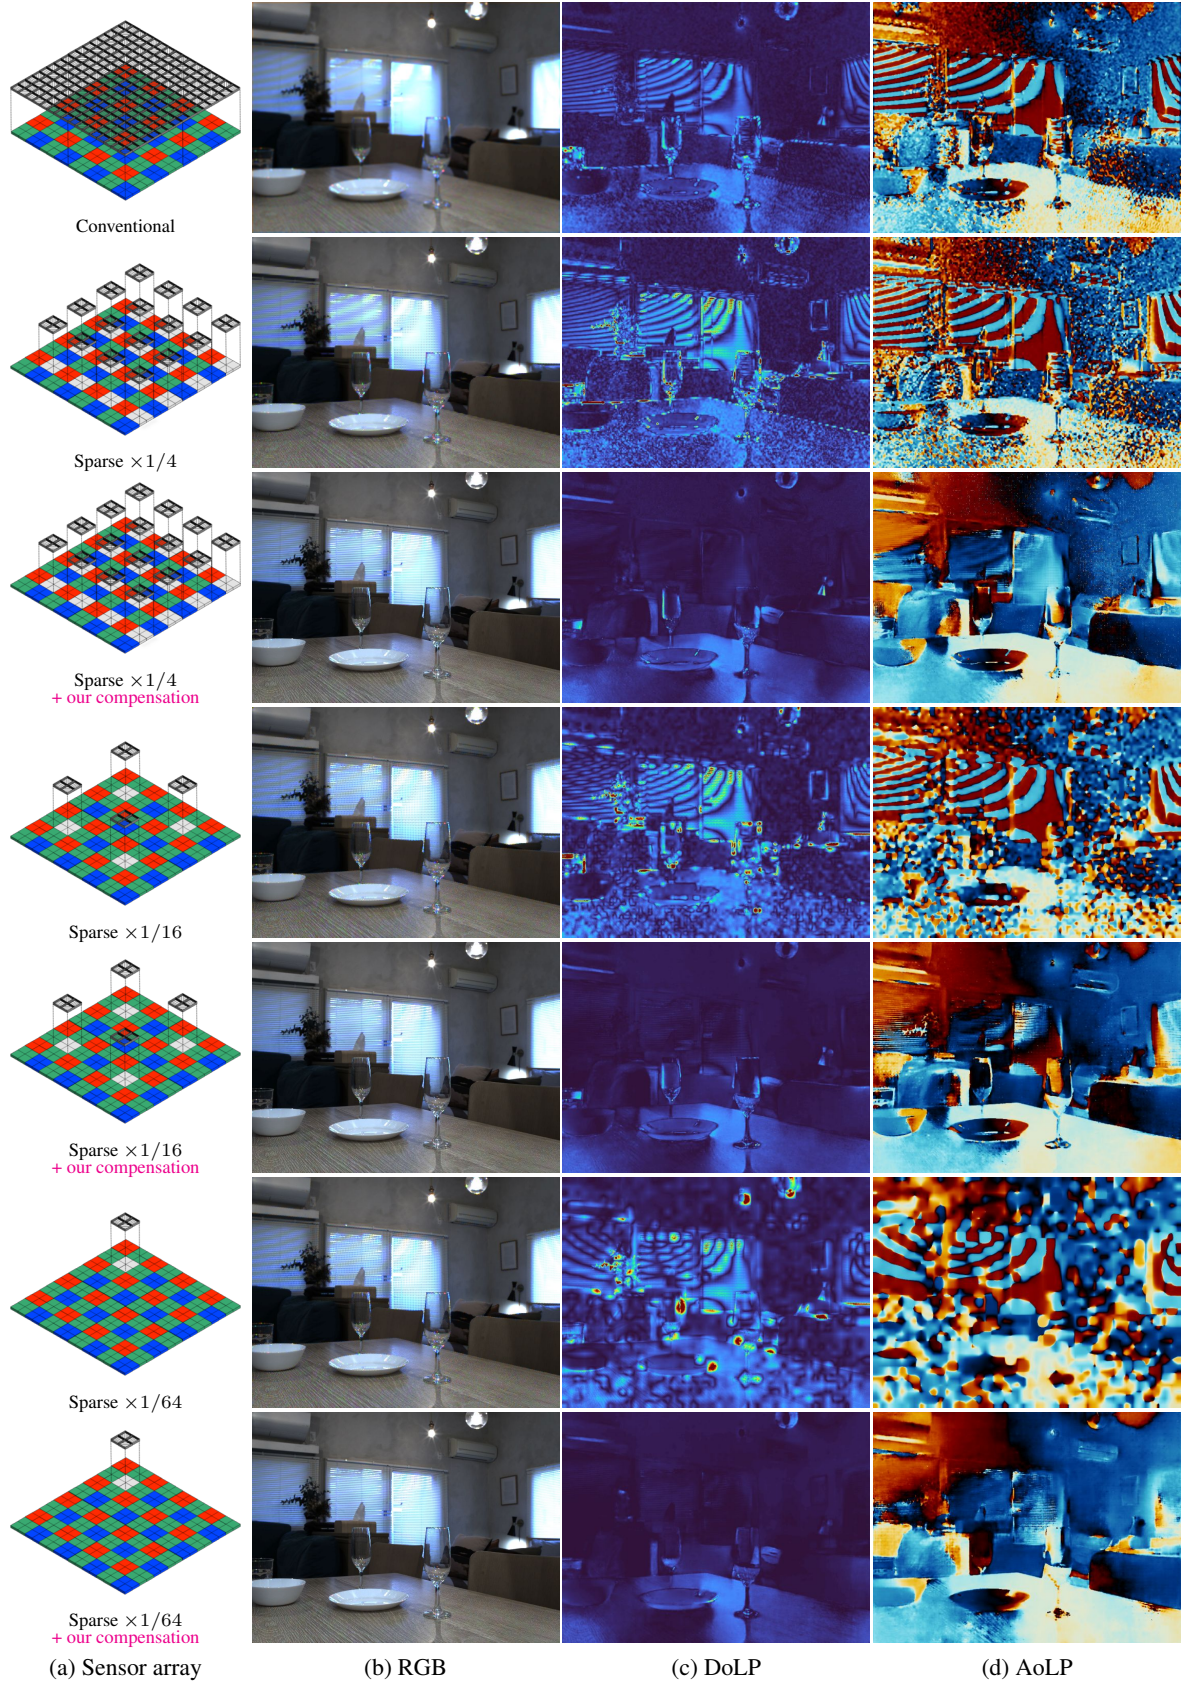

Figure 18. **Scene10: Comprehensive qualitative evaluation of conventional and sparse polarization sensors.** The effectiveness of our compensation is qualitatively demonstrated.

## References

- [1] Yunhao Ba, Alex Gilbert, Franklin Wang, Jinfa Yang, Rui Chen, Yiqin Wang, Lei Yan, Boxin Shi, and Achuta Kadambi. Deep shape from polarization. In European Conference on Computer Vision (ECCV), pages 554–571. Springer, 2020. 2
- [2] Chakravarty R Alla Chaitanya, Anton S Kaplanyan, Christoph Schied, Marco Salvi, Aaron Lefohn, Derek Nowrouzezahrai, and Timo Aila. Interactive reconstruction of monte carlo image sequences using a recurrent denoising autoencoder. ACM Transactions on Graphics (TOG), 36(4):1–12, 2017. 2
- [3] Teppei Kurita, Shun Kaizu, Yuhi Kondo, Yasutaka Hirasawa, and Ying Lu. Image processing device and image processing method, Oct. 29 2019. US Patent 10,460,422. 4
- [4] Chenyang Lei, Chenyang Qi, Jiaxin Xie, Na Fan, Vladlen Koltun, and Qifeng Chen. Shape from polarization for complex scenes in the wild. In Proceedings of the IEEE/CVF Conference on Computer Vision and Pattern Recognition (CVPR), pages 12632–12641, 2022. 2
- [5] Taishi Ono, Yuhi Kondo, Legong Sun, Teppei Kurita, and Yusuke Moriuchi. Degree-of-linear-polarization-based color constancy. In Proceedings of the IEEE/CVF Conference on Computer Vision and Pattern Recognition (CVPR), pages 19740–19749, June 2022. 2, 4
